# Supplementary material for: PALM: a powerful and adaptive latent model for prioritizing risk variants with functional annotations
Source: PubMed Central journal article supplement (PMC9950853; doi:10.1093/bioinformatics/btad068), 2023-02-06
Supplement: btad068_supplementary_data.pdf [file btad068_supplementary_data.pdf]

# Supporting information for “PALM: A Powerful and Adaptive Latent Model for Prioritizing Risk Variants with Functional Annotations”

Xinyi Yu<sup>1,2</sup>, Jiashun Xiao<sup>1,2</sup>, Mingxuan Cai<sup>2,3</sup>, Yuling Jiao<sup>4</sup>, Xiang Wan<sup>1,\*</sup>, Jin Liu<sup>5,6,\*</sup> and Can Yang<sup>2,\*</sup>

<sup>1</sup>Shenzhen Research Institute of Big Data, Shenzhen, China

<sup>2</sup>Department of Mathematics, The Hong Kong University of Science and Technology, Hong Kong

<sup>3</sup>Department of Biostatistics, City University of Hong Kong, Hong Kong

<sup>4</sup>School of Mathematics and Statistics, Wuhan University, Wuhan, China

<sup>5</sup>Centre for Quantitative Medicine, Health Services & Systems Research, Duke-NUS Medical School

<sup>6</sup>School of Data Science, The Chinese University of Hong Kong-Shenzhen, Shenzhen, China

\*To whom correspondence should be addressed.

## Contents

|          |                                                                                             |           |
|----------|---------------------------------------------------------------------------------------------|-----------|
| <b>1</b> | <b>More simulation results</b>                                                              | <b>3</b>  |
| 1.1      | Simulations when $z$ -values are from other distributions . . . . .                         | 3         |
| 1.2      | Simulations when $z$ -values are generated from a linear model . . . . .                    | 7         |
| 1.3      | Quantification of interaction effects between two annotations . . . . .                     | 9         |
| 1.4      | The influence of missing annotations on the performance of PALM on simulated data . . . . . | 10        |
| 1.5      | The influence of missing annotations on the performance of PALM on real data                | 14        |
| 1.6      | The influence of cross-validation folds on the performance of PALM . . . . .                | 15        |
| 1.7      | The influence of shrinkage parameter on PALM . . . . .                                      | 16        |
| 1.8      | The influence of tree depth on PALM . . . . .                                               | 17        |
| 1.9      | The influence of LD effects on PALM . . . . .                                               | 19        |
| <b>2</b> | <b>More about real data analysis</b>                                                        | <b>20</b> |
| 2.1      | Discussion on the performance of GPA-Tree . . . . .                                         | 20        |
| 2.2      | Performance of PALM with tree depth greater than 2 . . . . .                                | 24        |
| 2.3      | Numbers of prioritized SNPs in 30 GWASs . . . . .                                           | 25        |
| 2.4      | Genic category of prioritized SNPs by PALM . . . . .                                        | 27        |

|     |                                                                              |    |
|-----|------------------------------------------------------------------------------|----|
| 2.5 | Analysis on four Schizophrenia GWASs with different sample sizes . . . . .   | 28 |
| 2.6 | Analysis on two Years of Education GWASs with different sample sizes . . . . | 31 |
| 2.7 | Sources of 30 GWASs . . . . .                                                | 32 |

# 1 More simulation results

## 1.1 Simulations when $z$ -values are from other distributions

In the main simulation, we generate the  $z$ -score of each SNP by  $z_j \sim N(\mu_j, 1), j = 1, \dots, M$ , where  $\mu_j$  follows a *bimodal* distribution. We conduct additional simulations to compare the performances of PALM and other methods under alternative distributions of  $\mu$ .

| Scenario    | Distribution                                                                                   |
|-------------|------------------------------------------------------------------------------------------------|
| big-normal  | $N(0, 4^2)$                                                                                    |
| near-normal | $\frac{2}{3}N(0, 2^2) + \frac{1}{4}N(0, 3^2) + \frac{1}{12}N(0, 4^2)$                          |
| skew        | $\frac{1}{2}N(-2, 1^2) + \frac{1}{4}N(-1, 1^2) + \frac{1}{6}N(0, 2^2) + \frac{1}{12}N(1, 4^2)$ |
| spiky       | $0.4N(0, 0.5^2) + 0.2N(0, 1^2) + 0.2N(0, 3^2) + 0.2N(0, 5^2)$                                  |

Table S1: Alternative distributions of  $\mu$ .

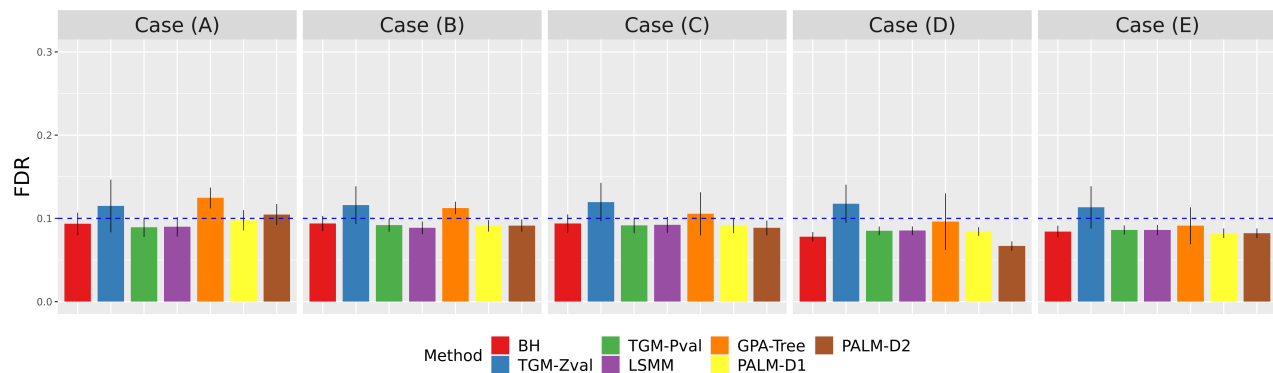

(a) FDR

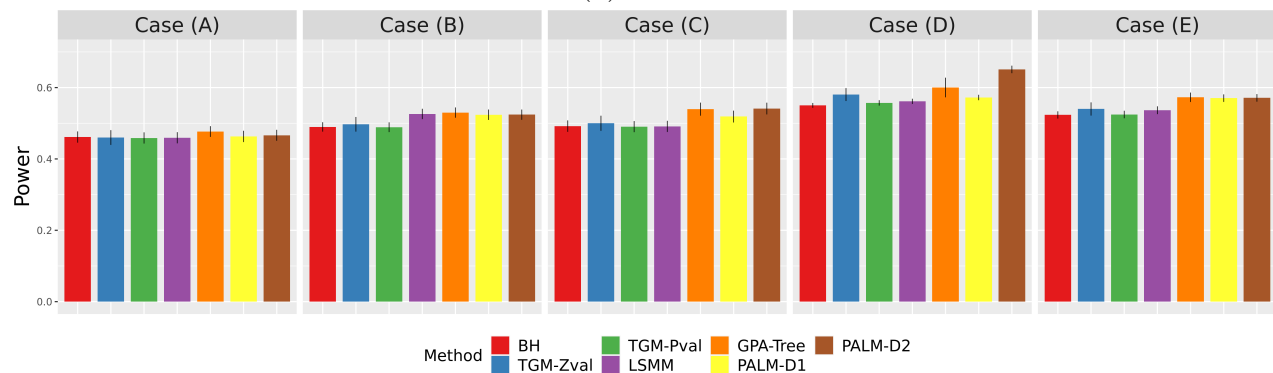

(b) Power

Figure S1: The comparison of PALM-D1 and PALM-D2 with alternative methods, BH, TGM-Pval, TGM-Zval, LSMM and GPA-Tree under  $M = 20000$ ,  $D = 50$  and non-null  $z$ -score distribution = *big-normal*. The cross-validation fold is  $K = 2$  for PALM-D1 and PALM-D2. The results are summarized from 50 replications.

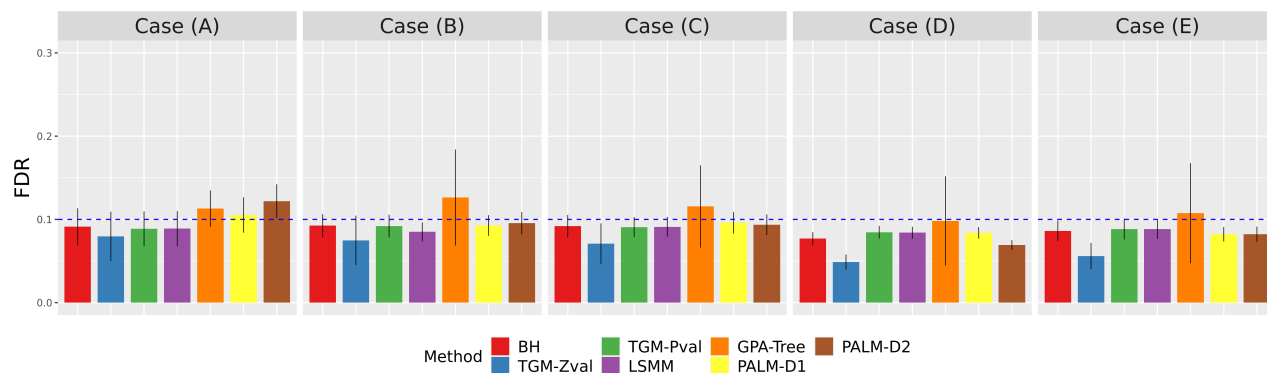

(a) FDR

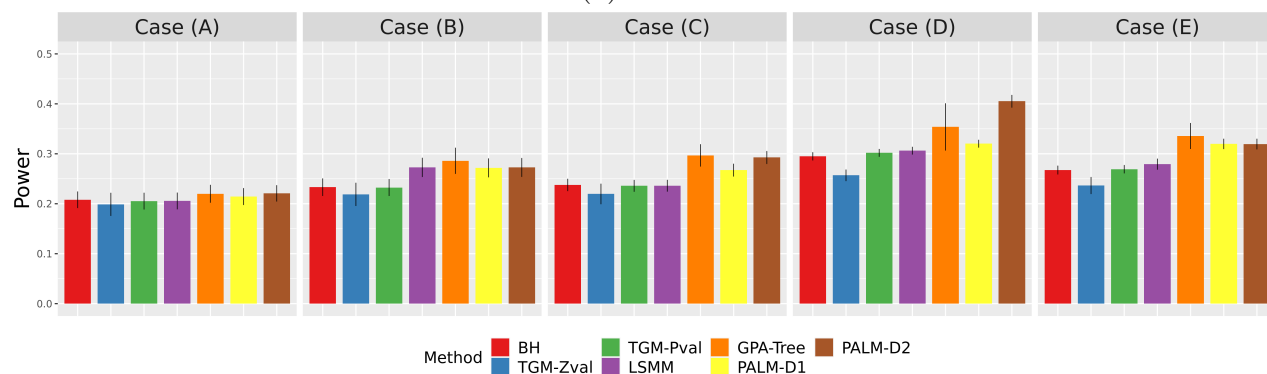

(b) Power

Figure S2: The comparison of PALM-D1 and PALM-D2 with alternative methods, BH, TGM-Pval, TGM-Zval, LSMM and GPA-Tree under  $M = 20000$ ,  $D = 50$  and non-null  $z$ -score distribution = *near-normal*. The cross-validation fold is  $K = 2$  for PALM-D1 and PALM-D2. The results are summarized from 50 replications.

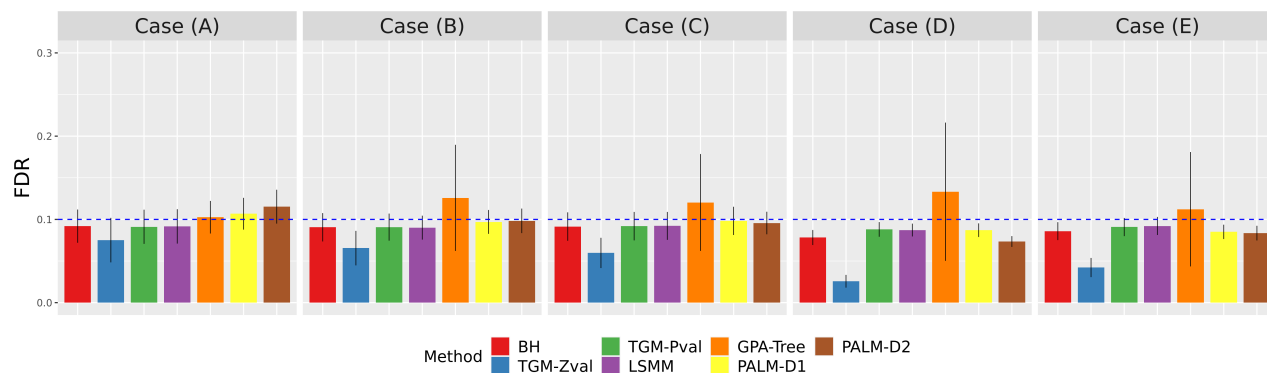

(a) FDR

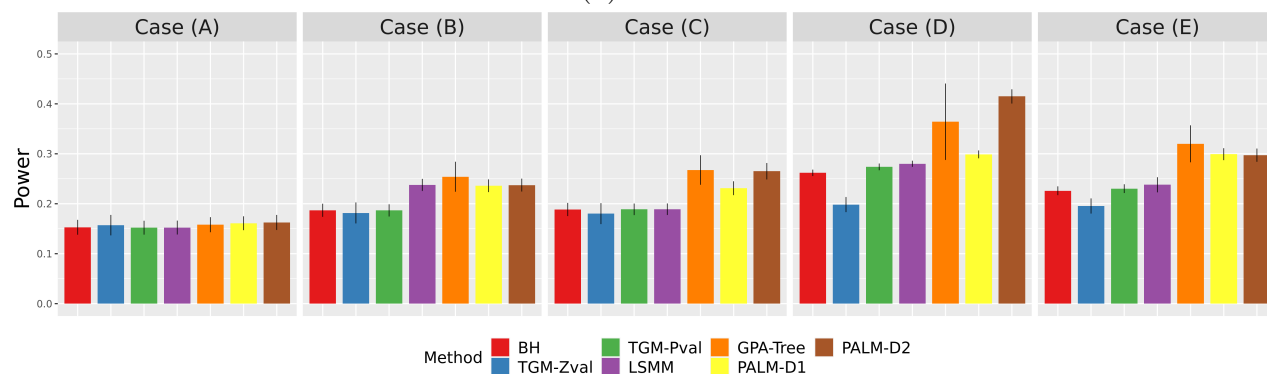

(b) Power

Figure S3: The comparison of PALM-D1 and PALM-D2 with alternative methods, BH, TGM-Pval, TGM-Zval, LSMM and GPA-Tree under  $M = 20000$ ,  $D = 50$  and non-null  $z$ -score distribution = *skew*. The cross-validation fold is  $K = 2$  for PALM-D1 and PALM-D2. The results are summarized from 50 replications.

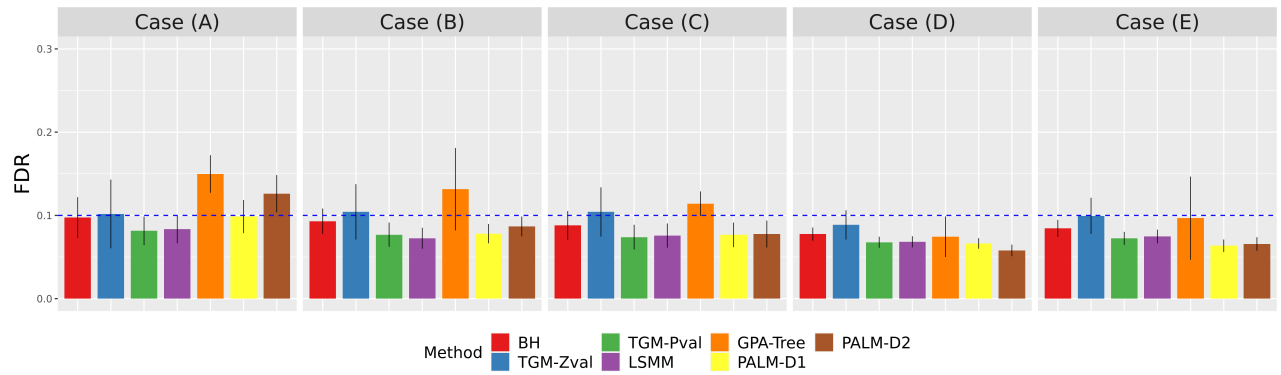

(a) FDR

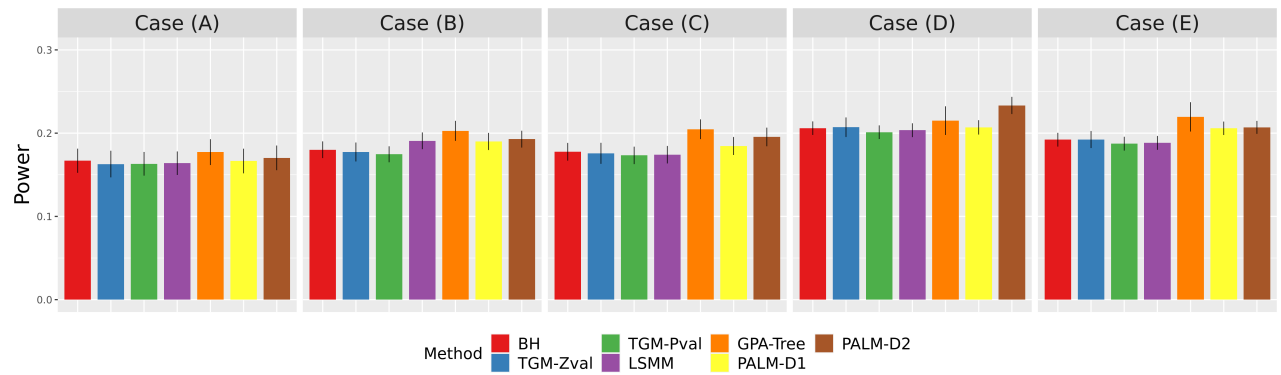

(b) Power

Figure S4: The comparison of PALM-D1 and PALM-D2 with alternative methods, BH, TGM-Pval, TGM-Zval, LSMM and GPA-Tree under  $M = 20000$ ,  $D = 50$  and non-null  $z$ -score distribution = *spiky*. The cross-validation fold is  $K = 2$  for PALM-D1 and PALM-D2. The results are summarized from 50 replications.

## 1.2 Simulations when $z$ -values are generated from a linear model

In GWAS, the  $z$ -scores of SNPs are typically calculated from a linear model with individual data. Specifically, with an assumed heritability  $h^2$  and number of non-null SNPs  $N_{nonnull}$ , the common linear model takes the form:

$$y = X\beta + \epsilon,$$

where  $y$  is the phenotype vector,  $X$  is the standardised genotype matrix,  $\beta \sim \mathcal{N}(0, \frac{h^2}{N_{nonnull}})$  and  $\epsilon \sim \mathcal{N}(0, 1 - h^2)$ . The  $z$ -score of each SNP can be calculated by performing marginal linear regression. Here we investigate the performance of PALM and compared methods with  $z$ -scores generated in this way rather than directly from a prespecified distribution. Since PALM assumes the independence of  $z$ -scores and mainly focus on evaluating its performance on the computed  $z$ -scores in this section, we will generate genotype matrix with uncorrelated SNPs. For the influence of LD, please refer to supplementary section 1.6.

We consider a realistic setting with heritability  $h^2 = 0.2$ , sample size  $n = 20,000$ , total number of SNPs  $M = 10,000$  and number of annotation  $L = 50$ . First, for individual  $i$ , we randomly sample  $M$  minor allele frequencies (MAFs) from  $f_j \sim U[0.05, 0.5], j = 1, \dots, M$  and generate genotype  $g_{ij}$  of individual  $i$  from  $g_i \sim Binomial(2, f_j), j = 1, \dots, M$  then standardize  $\mathbf{g}_j$  to have mean 0 and variance 1 (the standardised genotype is denoted as  $x_{ij}$ ). Second, following the simulation in the paper, we generate annotation matrix  $A$  of shape  $M \times L$ . Third, the prior probability of each SNP for being in non-null group  $\pi_{j1}$  is calculated by Eq. (9) in the paper and the association status is generated by  $Z_j \sim Bernoulli(\pi_{j1}), j = 1, \dots, M$ . With  $Z_j$ , we know the true non-null SNP indices and thus the number of non-null SNPs  $N_{nonnull}$ . For the null SNPs  $j \in \{k | Z_k = 0\}$ , their effect sizes are set to be zero; for the non-null SNPs, their effect sizes are randomly sampled by  $\beta_j \sim \mathcal{N}(0, \frac{h^2}{N_{nonnull}}), j \in \{k | Z_k = 1\}$ . Then the phenotype of each individual  $i$  is generated by  $y_i = X_i\beta + \epsilon_i, i = 1, \dots, n$ . Finally, the estimates of effect size of each SNP  $\hat{\beta}_j$  and its standard error  $se(\hat{\beta}_j)$  can be calculated by regressing  $y$  onto  $X_j$ . Thus  $z$ -score  $z_j$  can be obtained by  $z_j = \frac{\hat{\beta}_j}{se(\hat{\beta}_j)}$ . After the summary statistics have been generated, we can perform and evaluate all the methods just as the simulation in the paper.

Fig. S5 shows the FDR and power for all the methods. Except for GPA-Tree, all the other methods can provide satisfactory FDR control (the following discussion will exclude GPA-Tree). For case (A), the power of methods integrating annotations (LSMM, PALM-D1 and PALM-D2) is of the same level with methods only using summary statistics (BH, TGM-zval and TGM-Pval); for case (B), LSMM, PALM-D1 and PALM-D2 have similarly higher power than methods without using annotations; for case (C)(D)(E), PALM can model nonlinear relationship between annotation and association status thus having significant gain in power compared with other methods. In summary, the results validate the effectiveness of PALM with  $z$ -scores generated from a linear model.

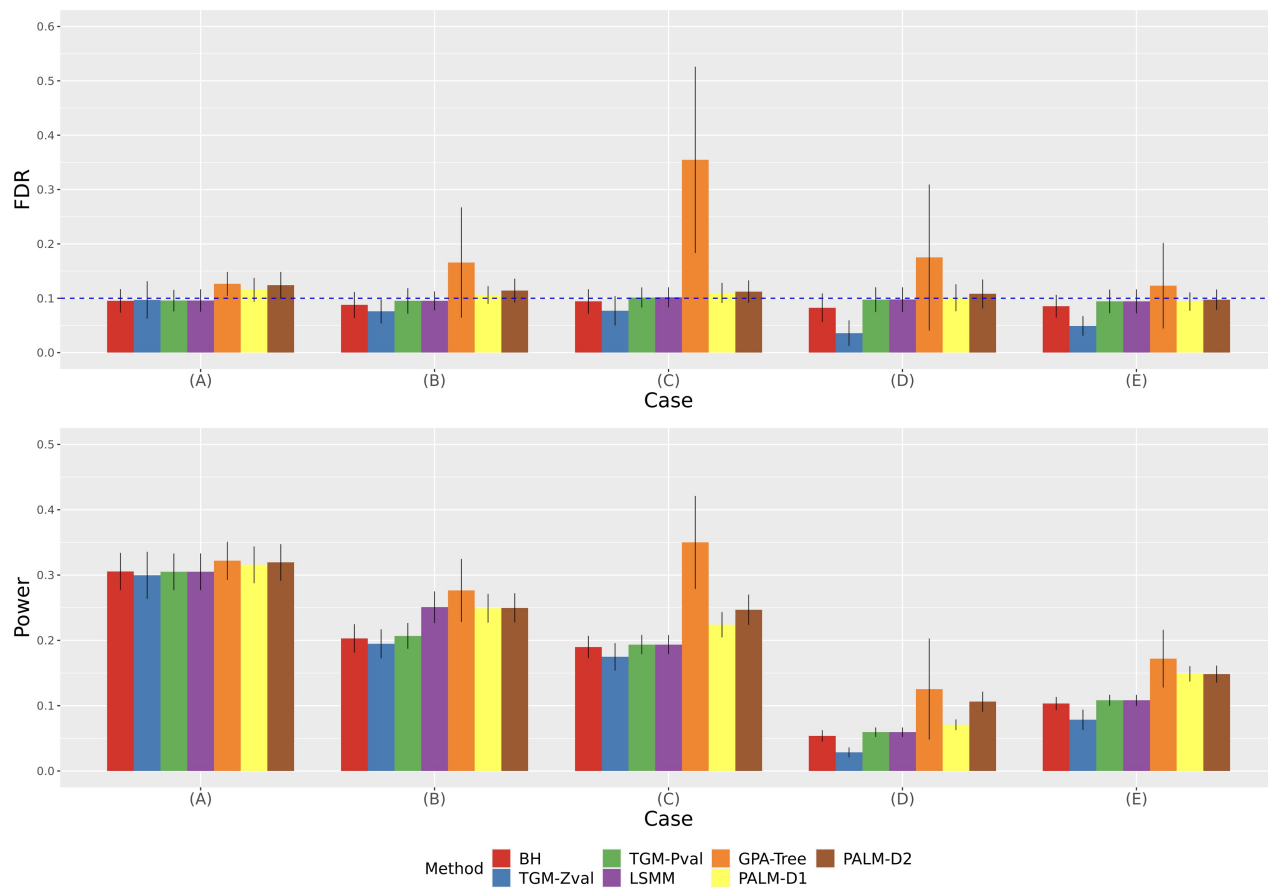

Figure S5: Performance of PALM-D1 and PALM-D2 with other related methods, including BH, TGM-Pval, TGM-Zval, LSMM and GPA-Tree. Heritability  $h^2 = 0.2$ , number of samples  $n = 20,000$ , number of SNPs  $M = 10,000$ , and number of annotations  $L = 50$ .



### 1.3 Quantification of interaction effects between two annotations

In this section, we discuss how to quantify the interaction effects between two annotations using PALM. Friedman’s H-statistic is introduced to quantify interaction effects [10]. Consider a function  $F$  of several features  $x_l, l = 1, \dots, L$ , if two features  $x_j$  and  $x_k$  don’t interact, we can decompose the 2-way partial dependence function [9] in the following way:

$$PD_{jk}(x_j, x_k) = PD_j(x_j) + PD_k(x_k), \quad (1)$$

where  $PD_{jk}(x_j, x_k)$  is the 2-way partial dependence function of both features, and  $PD_j(x_j)$  and  $PD_k(x_k)$  are the partial dependence functions of the single features. If the two features interact, Eq. (1) no longer holds and the difference between the observed 2-way partial dependence and the decomposed one reflects the interaction. Following this idea, the H-statistic measures the interaction between feature  $x_j$  and  $x_k$  as:

$$H_{jk}^2 = \frac{\sum_{i=1}^n [PD_{jk}(x_j^{(i)}, x_k^{(i)}) - PD_j(x_j^{(i)}) - PD_k(x_k^{(i)})]^2}{\sum_{i=1}^n PD_{jk}^2(x_j^{(i)}, x_k^{(i)})}, \quad (2)$$

where  $n$  is the sample size for fitting the model. Theoretically, with centered partial dependence functions, H-statistic is in  $[0, 1]$  and a larger  $H_{jk}^2$  means a stronger interaction between  $x_j$  and  $x_k$ . In the context of our paper, the 1-way and 2-way partial dependence functions can be calculated by:

$$PD_j(x_j) = \frac{1}{M} \sum_{i=1}^M \hat{F}(x_j, x_{\setminus j}^{(i)}), \quad (3)$$

$$PD_{jk}(x_j, x_k) = \frac{1}{M} \sum_{i=1}^M \hat{F}(x_j, x_k, x_{\setminus jk}^{(i)}), \quad (4)$$

where  $M$  is the SNP number,  $\hat{F}$  is the fitted boosted trees,  $\setminus j$  and  $\setminus jk$  represent features except  $j$  and  $j, k$ , respectively.

We implemented the calculation of H-statistic with PALM-D2 (PALM-D1 cannot model interaction). Fig. R1(a) shows the 2-way interactions of the first 5 annotations in case (B), (C), (D) and (E). The H-statistics of feature pairs with interaction effects are significantly larger than zeros while other feature pairs have H-statistics close to zero.

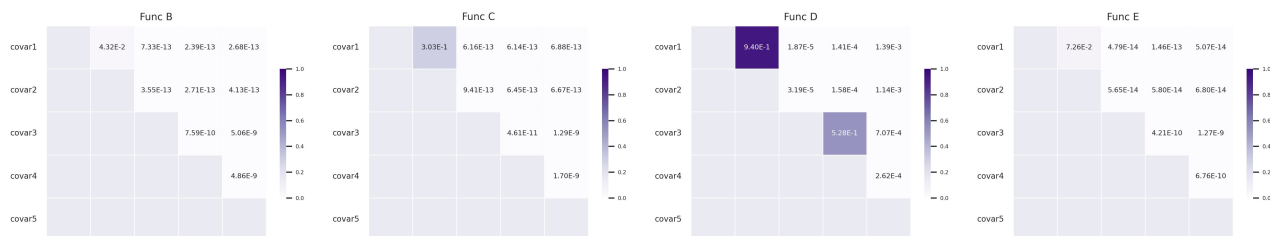

Figure S6: Two-way interactions of the first 5 annotations in case (B), (C), (D) and (E).

## 1.4 The influence of missing annotations on the performance of PALM on simulated data

As PALM is based on the gradient boosting decision trees, it is capable of handling missing values in functional annotations  $\mathbf{A}$ . We conduct simulations to gauge the influence of missing value rate of annotation matrix  $\mathbf{A}$  on the performance of PALM on simulated data. In details, we consider four values of missing rates, *i.e.*,  $mrate \in \{0.05, 0.1, 0.2, 0.4\}$ , and use 2-fold cross-validation to select the optimal number of trees. The missing elements in the synthetic annotation matrix  $\mathbf{A}$  are randomly chosed.

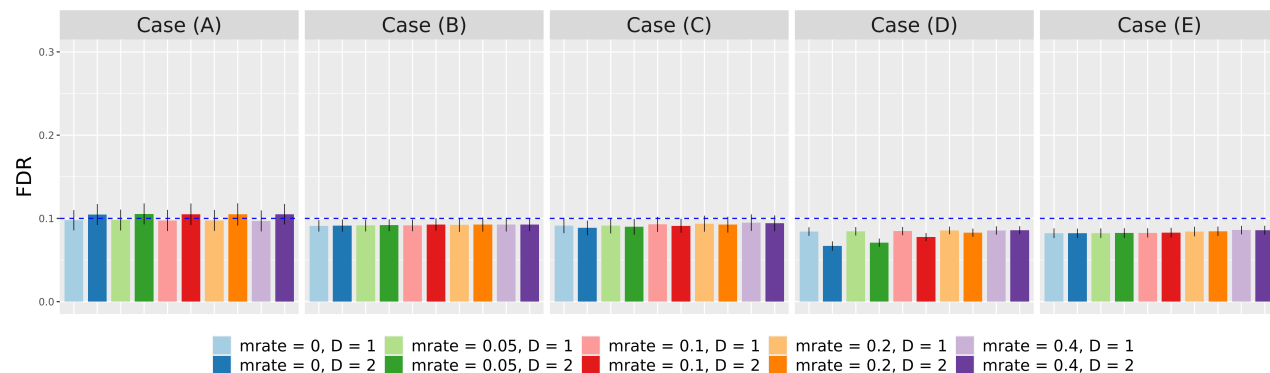

(a) FDR

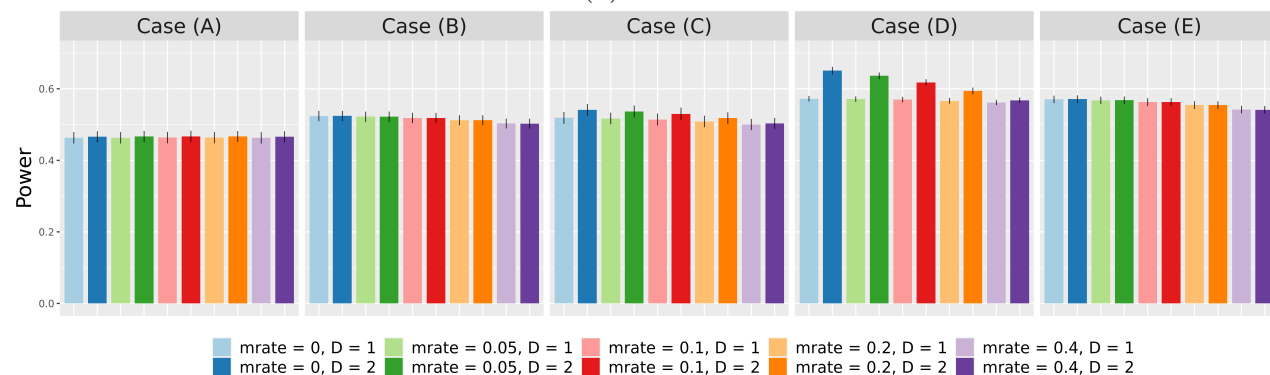

(b) Power

Figure S7: The comparison of PALM-D1 and PALM-D2 under different missing rates.  $M = 20000$ ,  $D = 50$  and non-null  $z$ -score distribution = *big-normal*. The results are summarized from 50 replications.

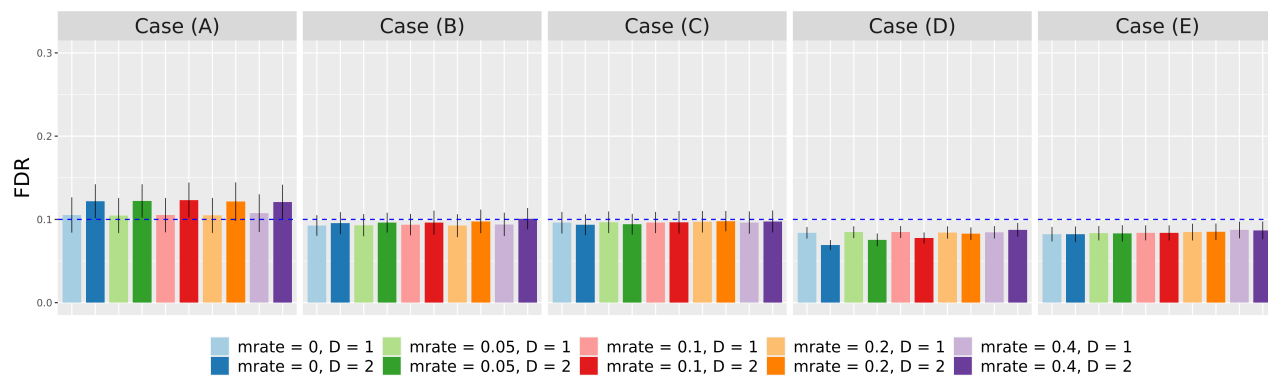

(a) FDR

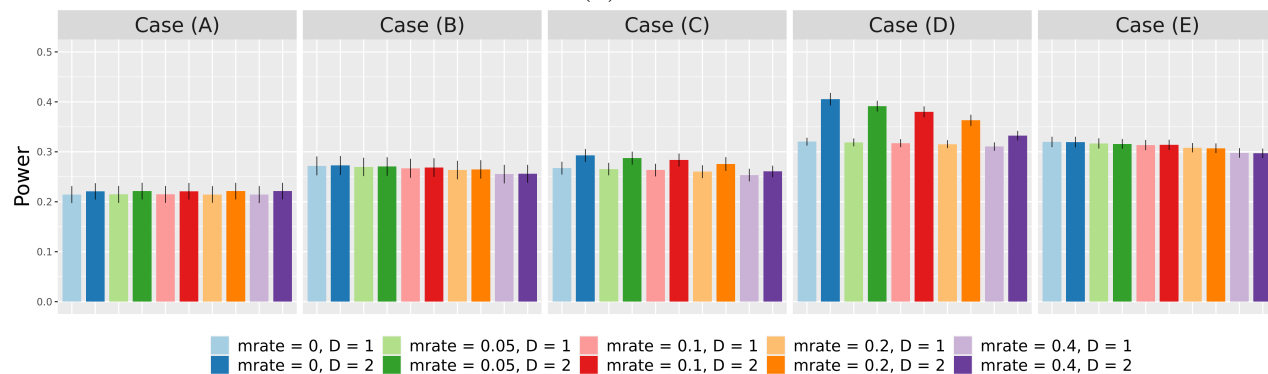

(b) Power

Figure S8: The comparison of PALM-D1 and PALM-D2 under different missing rates.  $M = 20000$ ,  $D = 50$  and non-null  $z$ -score distribution = *near-normal*. The results are summarized from 50 replications.

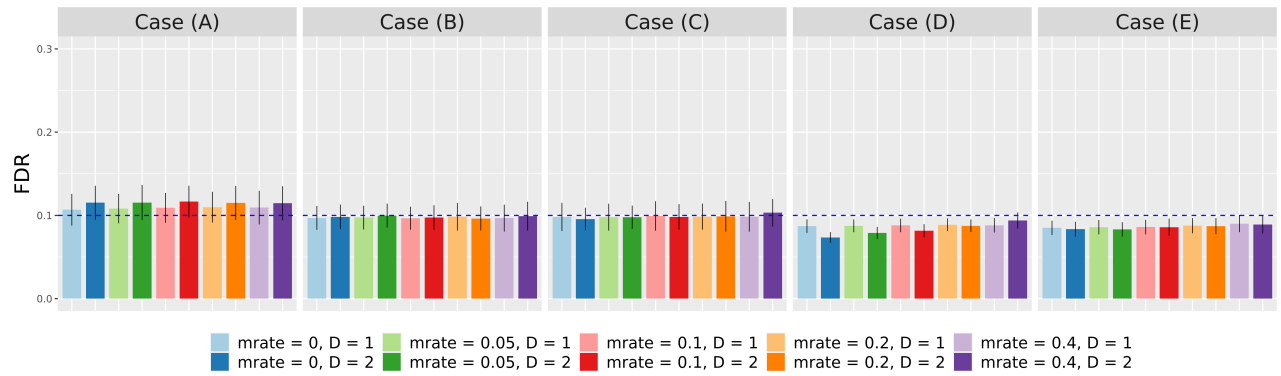

(a) FDR

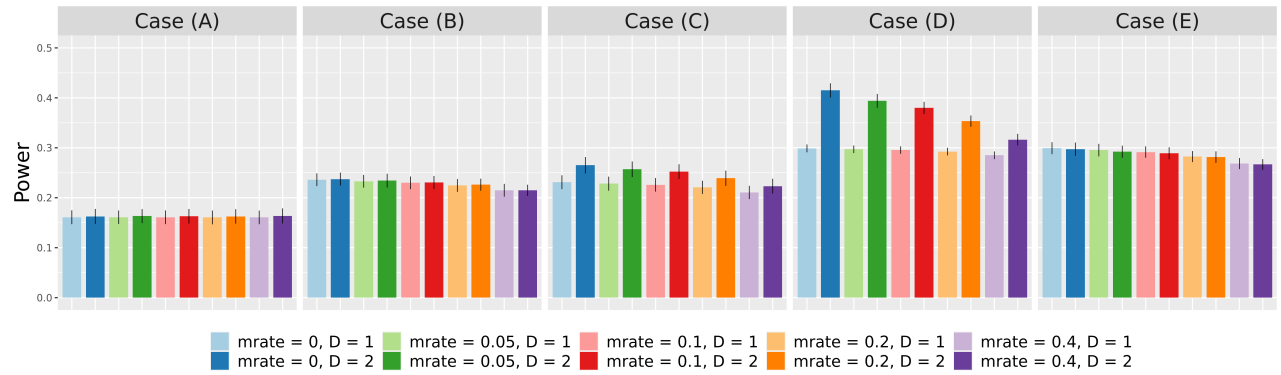

(b) Power

Figure S9: The comparison of PALM-D1 and PALM-D2 under different missing rates.  $M = 20000$ ,  $D = 50$  and non-null  $z$ -score distribution = *skew*. The results are summarized from 50 replications.

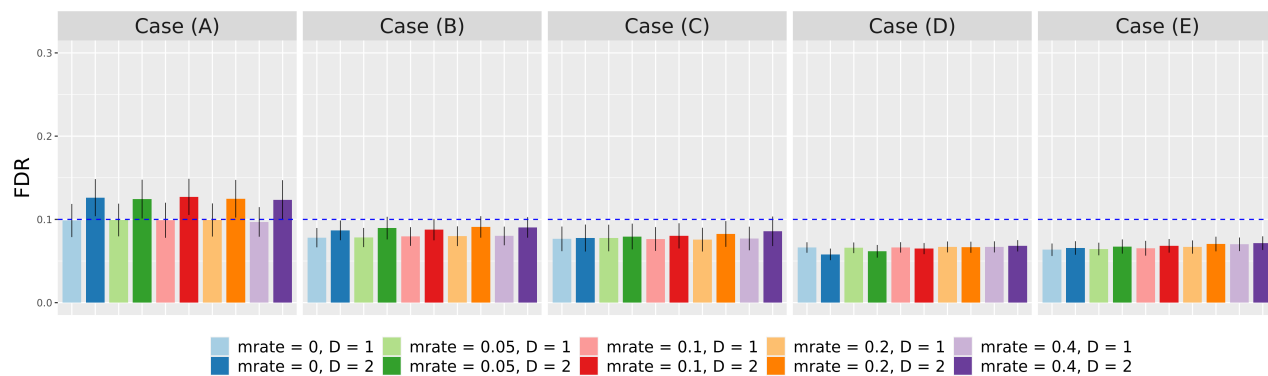

(a) FDR

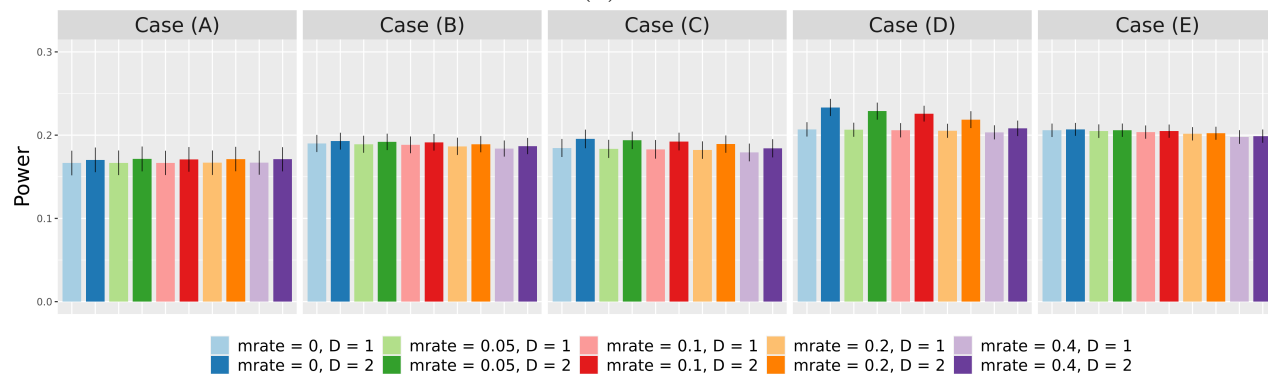

(b) Power

Figure S10: The comparison of PALM-D1 and PALM-D2 under different missing rates.  $M = 20000$ ,  $D = 50$  and non-null  $z$ -score distribution = *spiky*. The results are summarized from 50 replications.

# 1.5 The influence of missing annotations on the performance of PALM on real data

We also conduct simulations to gauge the influence of missing value rate of annotation matrix **A** on the performance of PALM on real data. In details, we consider four values of missing rates, *i.e.*,  $mrate \in \{0.05, 0.1, 0.2, 0.4\}$ , and use 2-fold cross-validation to select the optimal number of trees. The missing elements in the real annotation matrix **A** are randomly chosen. In general, the number of prioritized SNPs will decrease as the missing rate of annotation matrix increases. The two exceptions are Alzheimer’s disease and HIV, whose numbers of prioritized SNPs under  $mrate = 0.2, 0.4$  are slightly greater than those of without missing values. The figure below therefore excludes these two GWASs for the sake of visualization.

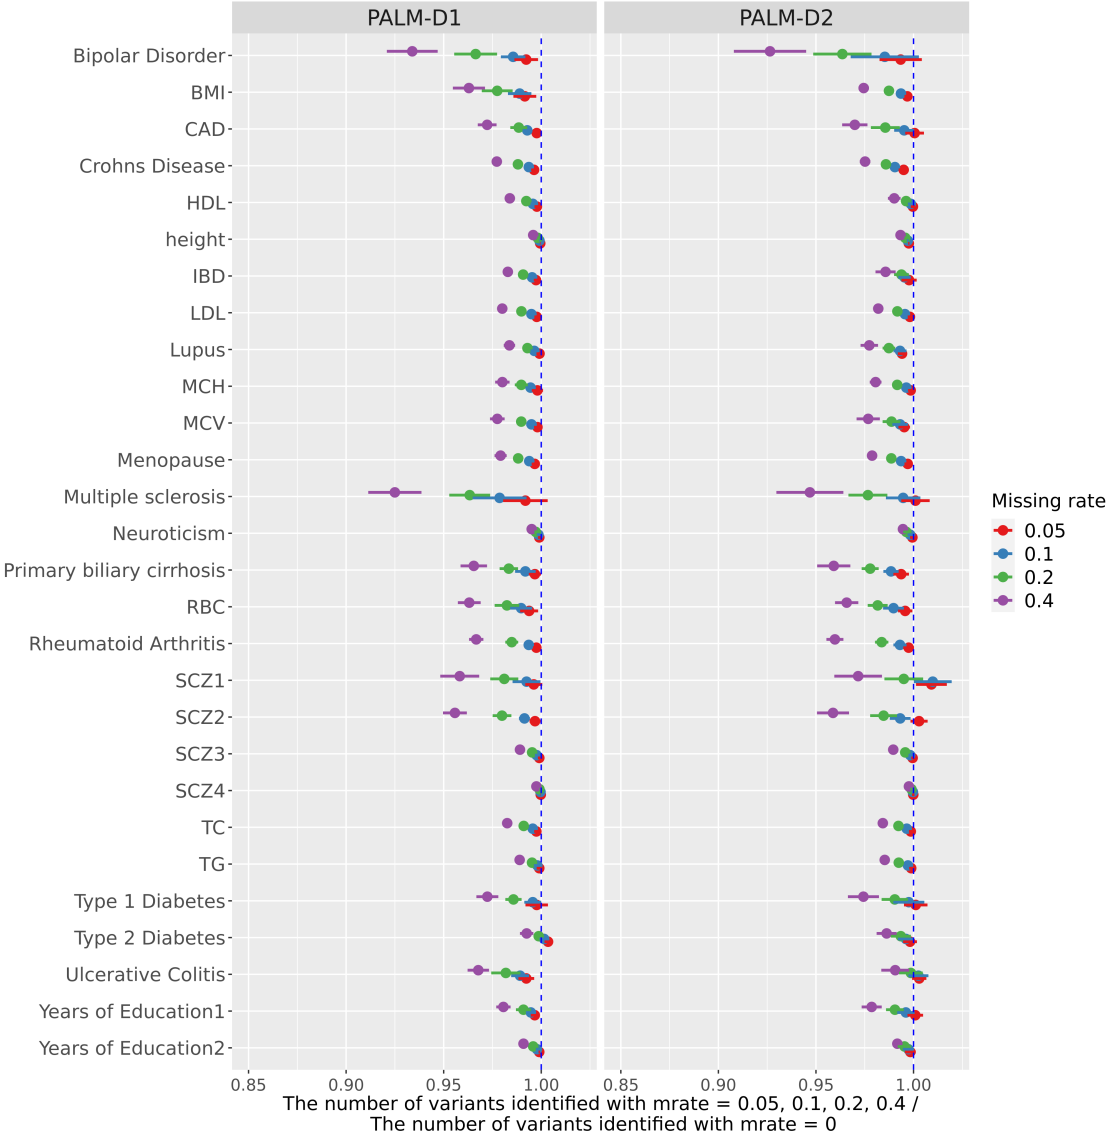

Figure S11: The number of risk variants identified by PALM-D1 and PALM-D2 on real data, under different missing value rates of annotation matrix. For visualization purpose, these numbers are normalized by dividing the corresponding number of variants identified with  $mrate = 0$ . The number of variants identified are summarized from 30 replications.

## 1.6 The influence of cross-validation folds on the performance of PALM

In the main simulation, the optimal number of trees is selected by 5-fold cross validation. We conduct simulations to gauge the influence of cross-validation (CV) folds on the performance of PALM. Specifically, we apply PALM with 2-fold CV and 5-fold CV to the same simulated data then evaluate FDR and power.

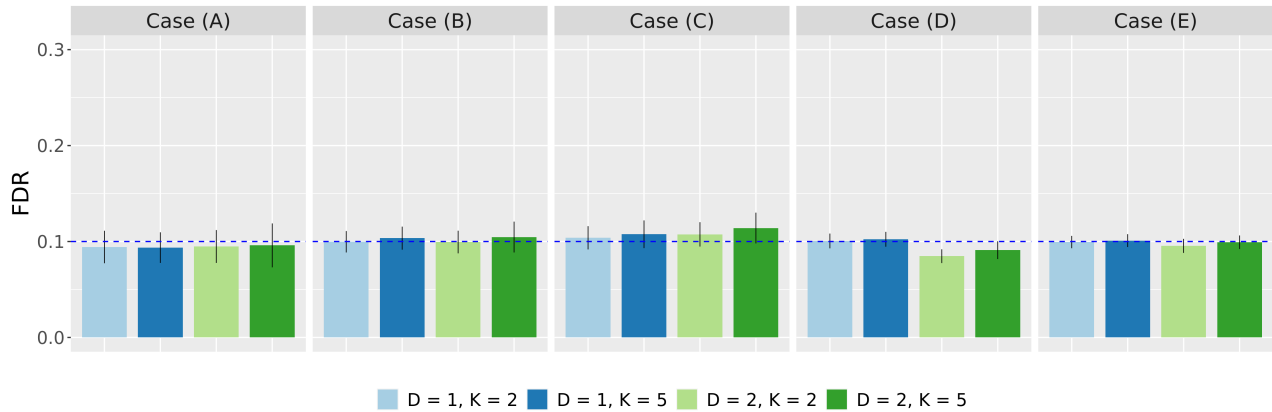

Figure S12: FDR

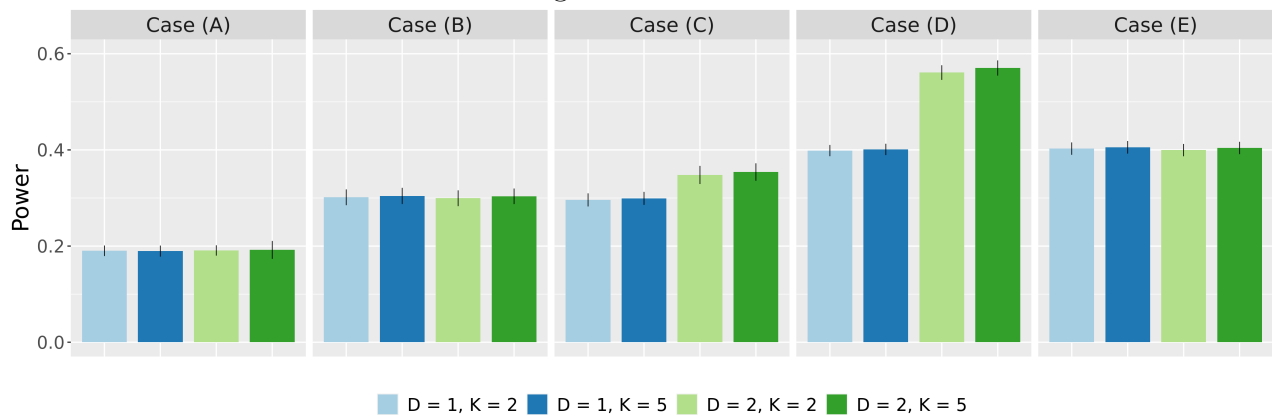

Figure S13: Power

Figure S14: The comparison of PALM-D1 and PALM-D2 with different cross-validation folds ( $K \in \{2, 5\}$ ) under  $M = 20000$ ,  $D = 50$  and non-null  $z$ -score distribution = *bimodal*. The results are summarized from 30 replications.

## 1.7 The influence of shrinkage parameter on PALM

In the main paper, we fix the shrinkage parameter  $\nu$  to be 0.1. Here, we use several different shrinkage parameters  $\nu \in \{0.01, 0.05, 0.2, 0.4, 0.8\}$  to run PALM under the same simulation setting as Fig 1(a) with  $M = 20,000$  and  $L = 50$ . From Figure S15(a), we observe that the magnitude of shrinkage parameter has minor impact on FDR control and power: for PALM-D1, the estimated FDR and power with different  $\nu$  under the five cases are almost the same. For PALM-D2, FDR with  $\nu = 0.8$  in case (C) is slightly higher than other  $\nu$ 's but still in the tolerable range; power with  $\nu = 0.01$  in case (D) is slightly lower than other  $\nu$ 's. Apart from the two exceptions, the differences on FDR and power between different shrinkage parameters are inapparent. Thus, the performance of PALM is insensitive to the choice of shrinkage parameters, as long as the number of trees is determined by cross-validation.

Although shrinkage parameter shows little influence on risk SNP prioritization, it has some impact on the number of trees of the final model after cross validation. As displayed in Figure S15, with a very small shrinkage parameter (e.g  $\nu = 0.01, 0.05$ ), the number of trees in the final model increases, i.e., the EM algorithm needs more iterations, thus more time-consuming.

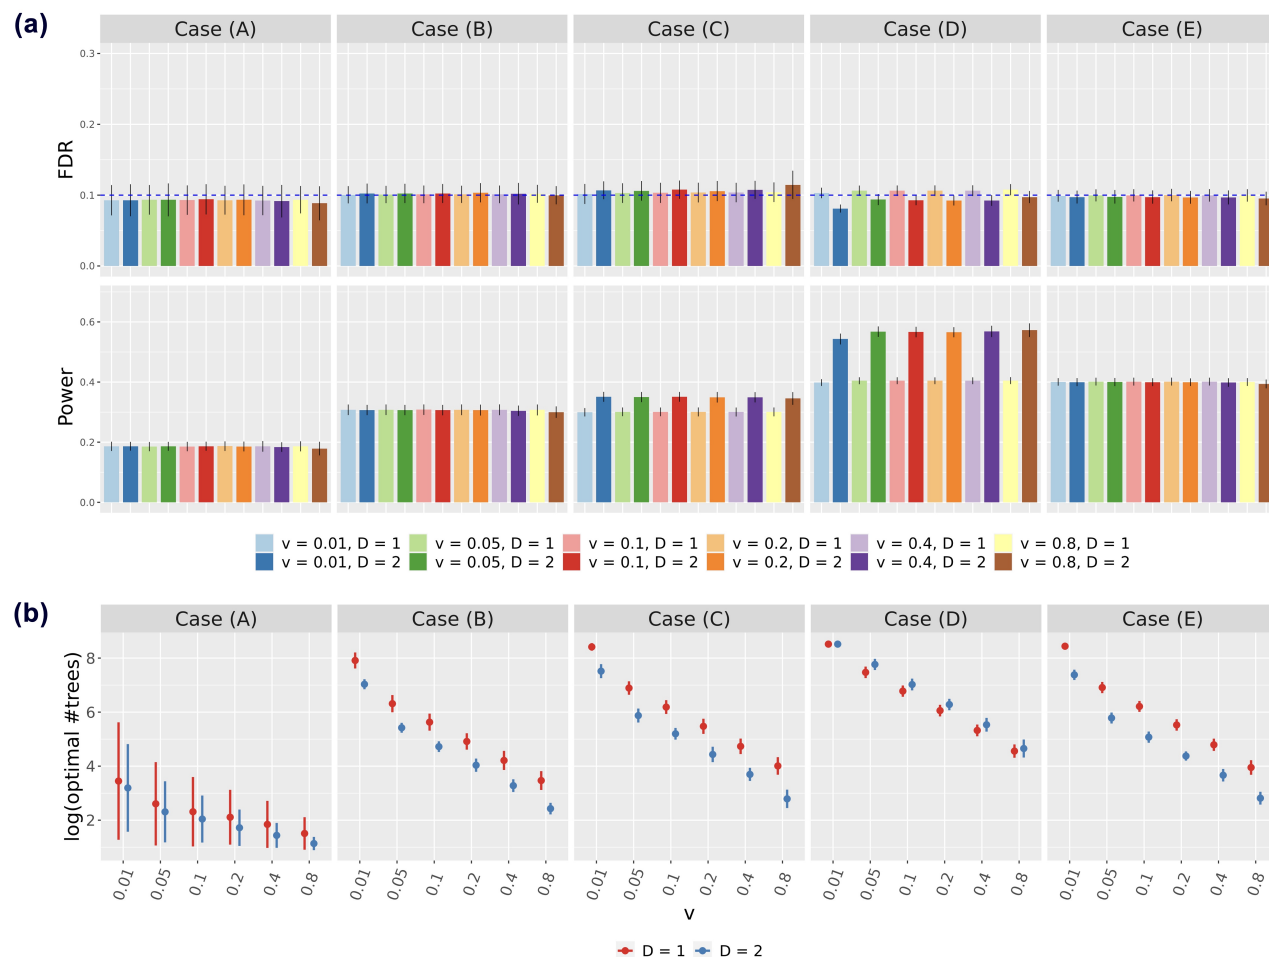

Figure S15: The influence of shrinkage parameter  $\nu$  on (a) the performances of PALM-D1 and PALM-D2 and (b) the log optimal number of trees of PALM-D1 and PALM-D2.  $\nu$  and  $D$  in the figures represent the shrinkage parameter and tree depth, respectively.



## 1.8 The influence of tree depth on PALM

We have extensively explored PALM with tree depth 1 and 2. Here, we performance PALM with tree depth 3 and 4 (PALM-D3 and PALM-D4 for short) under the same simulation settings in paper with SNP number  $M = 20,000$  and annotation number  $L = 50$ . Figure S16(a) implies that PALM-D3 can still control FDR while PALM-D4 shows a little inflation on FDR in case (B) and case (C). In terms of statistical power, PALM-D3 and PALM-D4 show no further improvement compared with PALM-D2 in case (C) and case (D). Although the optimal numbers of optimal trees of PALM-D3 and PALM-D4 are smaller than PALM-D1 and PALM-D2, the total computational times of PALM-D3 and PALM-D4 are notably higher since a larger individual tree costs more time to be fitted.

In summary, if we aim to identify more risk SNPs and the computation cost is not a concern, PALM-D2 is recommended; if we want to be more conservative and speed up the prioritization, then PALM-D1 is a great choice. We don't recommend to use trees with depth greater than 2 for risk SNP prioritization.

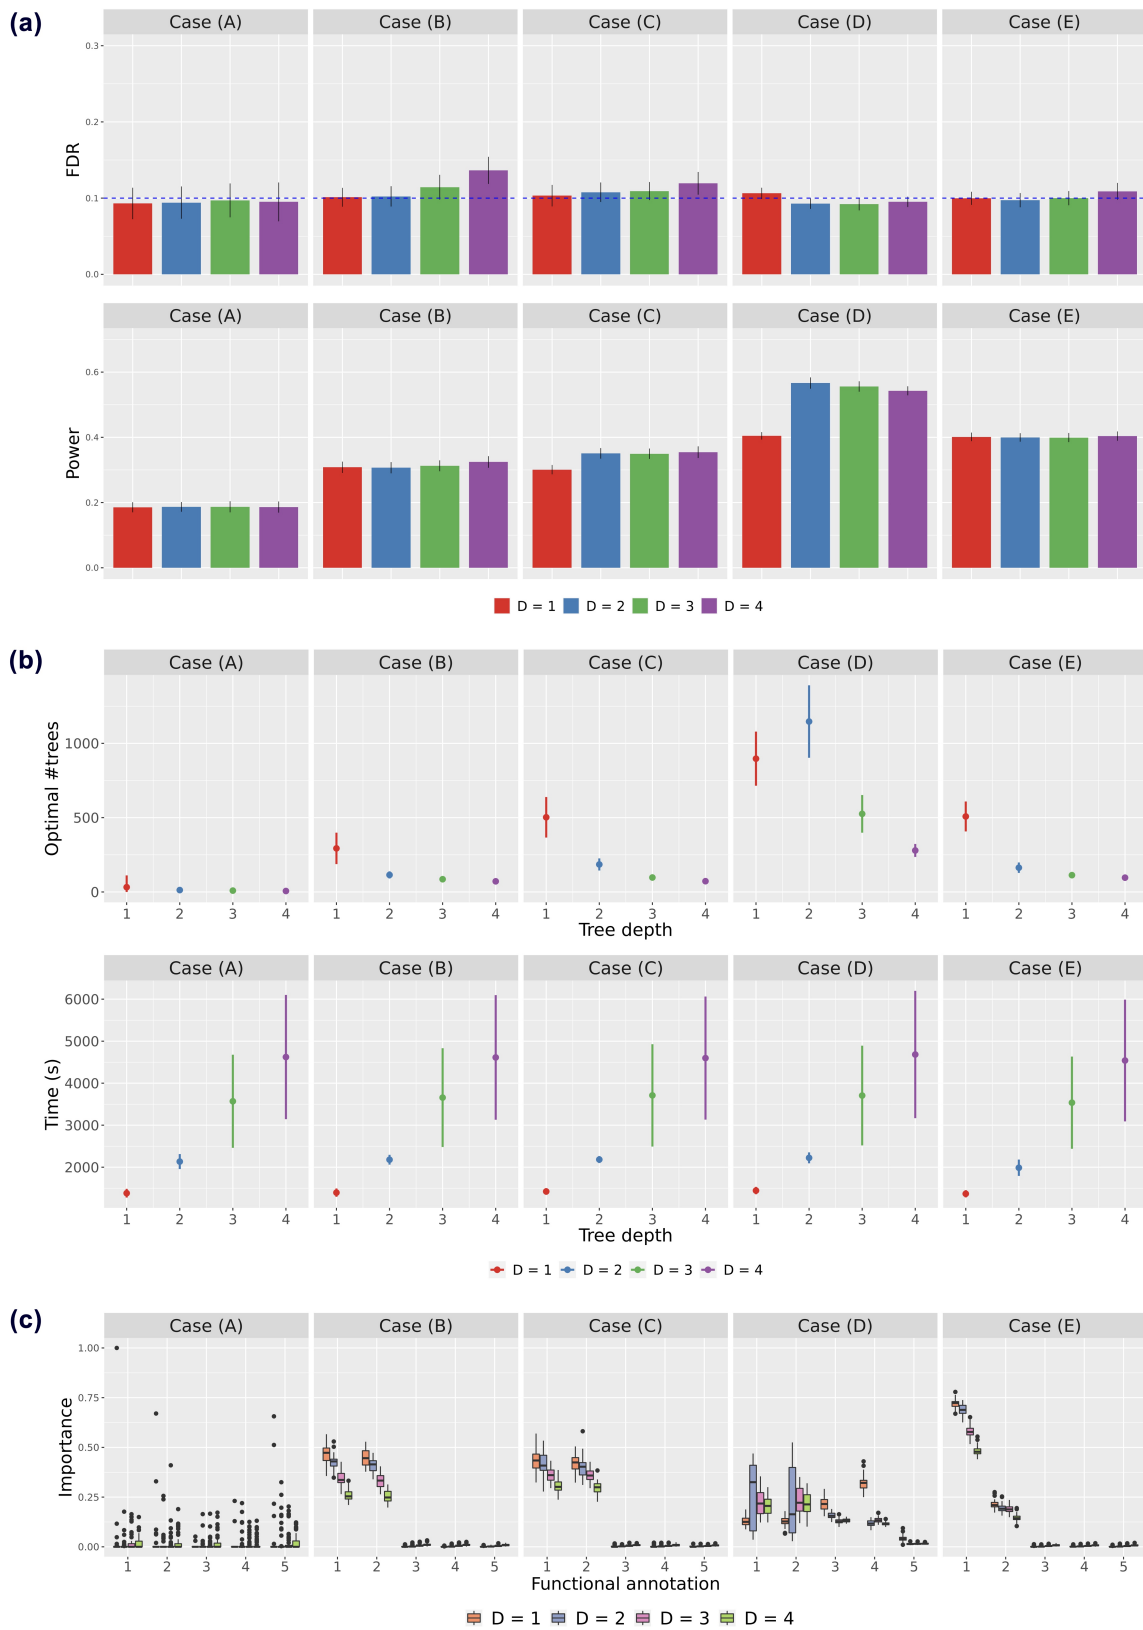

Figure S16: Comparison between PALM-D1, PALM-D2, PALM-D3 and PALM-D4 on (a) FDR and power of risk SNP prioritization, (b) optimal number of trees and total computational time, and (c) evaluated variable importance.

## 1.9 The influence of LD effects on PALM

Following LSMM, we study the influence of LD effects on PALM using real genotype data from The Wellcome Trust Case Control Consortium (WTCCC). We consider 23170 SNPs in chromosome 1 after quality control and randomly select 23 SNPs as true causal SNPs. We assume the 23 causal SNPs explain 5% phenotypic variance. We use GCTA to simulate phenotypes and PLINK to calculate  $p$ -values for all SNPs. We simulate 110 annotations: SNPs within 1Mb of causal SNPs are annotated by the first 10 annotations and by 20 of the last 100 annotations with a probability of 60%. All the other SNPs are annotated with a probability of 10%. We apply two-groups model of  $p$ -values (TGM-Pval), PALM-D1 and PALM-D2 to prioritize risk SNPs.

Because of the LD effects, it is unrealistic to detect the true causal SNPs. However, we can expect to identify the regions containing causal SNPs. We set different distance threshold to define the regions around causal SNPs. Any prioritized risk SNP within the regions will be counted as true positive. As shown in Figure S17, without integrating annotations, two-groups model can stably control FDR even under the smallest distance threshold (100kb). Since SNPs within 1Mb of causal SNPs are more likely to be annotated, resulting in the increasing probability of being prioritized, it is difficult for PALM to well control FDR under a small distance threshold. As the distance threshold increases, both PALM-D1 and PALM-D2 become more conservative. We observe that FDR can be controlled at the nominal level 0.1 with a distance threshold of 500kb and 800kb for PALM-D1 and PALM-D2, respectively.

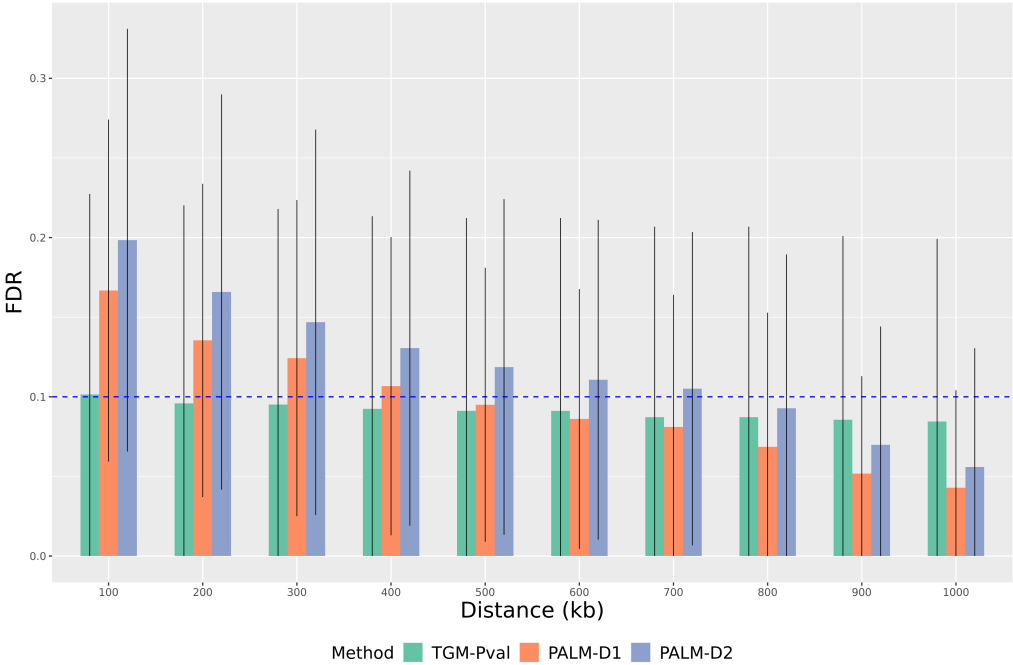

Figure S17: FDR of two-groups model and PALM for risk SNPs prioritization with different distance thresholds. The results are summarized from 50 replications.

## 2 More about real data analysis

### 2.1 Discussion on the performance of GPA-Tree

GPA-Tree [12] extends the two-groups model (TGM) by modeling the prior of SNP association status with a single tree. For the algorithm of GPA-Tree, on the first stage, parameter  $\alpha$  of the two-groups model is estimated by fitting a linear regression in the M step; on the second stage, with  $\alpha$  fixed at its estimation, a full tree is fitted then pruned with a complexity parameter  $cp$  in each iteration until the incomplete likelihood no longer increases even with other  $cp$  choices. In the simulation study, GPA-Tree did not well control FDR under several cases. In the real data analysis, GPA-Tree did not provide a satisfactory prioritization of risk SNPs: for quite a few traits, it identified even fewer SNPs than TGM; but it identified much more SNPs than other related methods on several traits. It seems that GPA-tree suffers from a stability issue.

To figure out the problem with GPA-Tree, we investigate the model fitting process of GPA-Tree on real data. Figure S18 shows the incomplete log-likelihoods on the first and second stage obtained by GPA-Tree. We observe that for more than half of the GWASs, the log-likelihood at the end of second stage is even smaller than that at the end of first stage; while for several traits, namely HIV, lupus and rheumatoid arthritis, the log-likelihood has a jump on the second stage (these three traits are exactly the ones with much more SNPs prioritized by GPA-Tree). The cause of these phenomena can be attributed to the algorithm design and limitation of the model. In order to prevent overfitting, GPA-Tree pruned the fitted full tree with the complexity parameter  $cp$ . An aggressive  $cp$  might leads to uncontrolled FDR while a conservative  $cp$  can limit the power of risk SNP prioritization. With a common  $cp$  (e.g 0.005), it is hard to achieve both good power and FDR control for all GWASs. Hence, for some traits, the log-likelihood using the pruned tree increases compared with that using a linear regression model; but for many other traits, the log-likelihood degrades on the second stage, indicating that the use of pruned tree is not more effective than a linear model; for several other traits, because another smaller  $cp$  in the set of candidate  $cp$ 's has been found, the newly pruned tree is dramatically enlarged, resulting in a sudden increase in log-likelihood. Since there is no stable regularization in GPA-Tree, it cannot credibly and consistently improve risk SNP prioritization.

Besides the instability, we also notice that, for almost all traits without a jump in log-likelihood, the tree structure does not change throughout the second stage of GPA-Tree. Figure S19 shows the tree depths along the iterations on the second stage. Except for HIV, lupus and rheumatoid arthritis, the tree depths of all the other traits remain unchanged during EM iterations. Indeed, not only the tree depths keep the same but also the split nodes barely change throughout the second stage. For instance, the tree structure of BMI only changed once during EM iterations and the final tree only involves two annotations; the tree structure of type 1 diabetes keeps unchanged in all iterations (Figure S20(a)(b)). In other words, only the leaf values are updated in most of the iterations but at the cost of fitting a huge full size tree and pruning, suggesting the low efficiency of GPA-Tree's model fitting process.

We also plot the trees fitted by GPA-Tree of traits with abnormally large number of prioritized SNPs (Figure S20(c)(d)(e) for rheumatoid arthritis, HIV and lupus) and two traits with prioritized SNPs fewer than TGM (Figure S20(f)(g) for multiple sclerosis and

type 2 diabetes). Notice that the annotations used to split nodes in rheumatoid arthritis, HIV and lupus before the jump are in accordance with the important annotations ranked by PALM. Because of the unstable algorithm, however, GPA-Tree fits much larger trees in the following iterations and causes inflation. For multiple sclerosis and type 2 diabetes, although the complexity of the final trees is controlled, it does not fully make use of the annotations. Compared with PALM, the tree of multiple sclerosis does not use the annotation *primary B cells from peripheral blood* which is evaluated to have nonnegligible importance; the tree of type 2 diabetes does not include multiple useful annotations such as *monocytes-CD14+ RO01746 primary cells*, *K562 leukemia cells* and *fetal hearts*. On the contrary, PALM uses a shallow tree to fit the residual in each EM iteration and ensemble these trees. Therefore, each individual tree in PALM can contribute to fitting a complex function in different aspects by choosing several annotations, and the aggregation of trees leads to a strong and stable model.

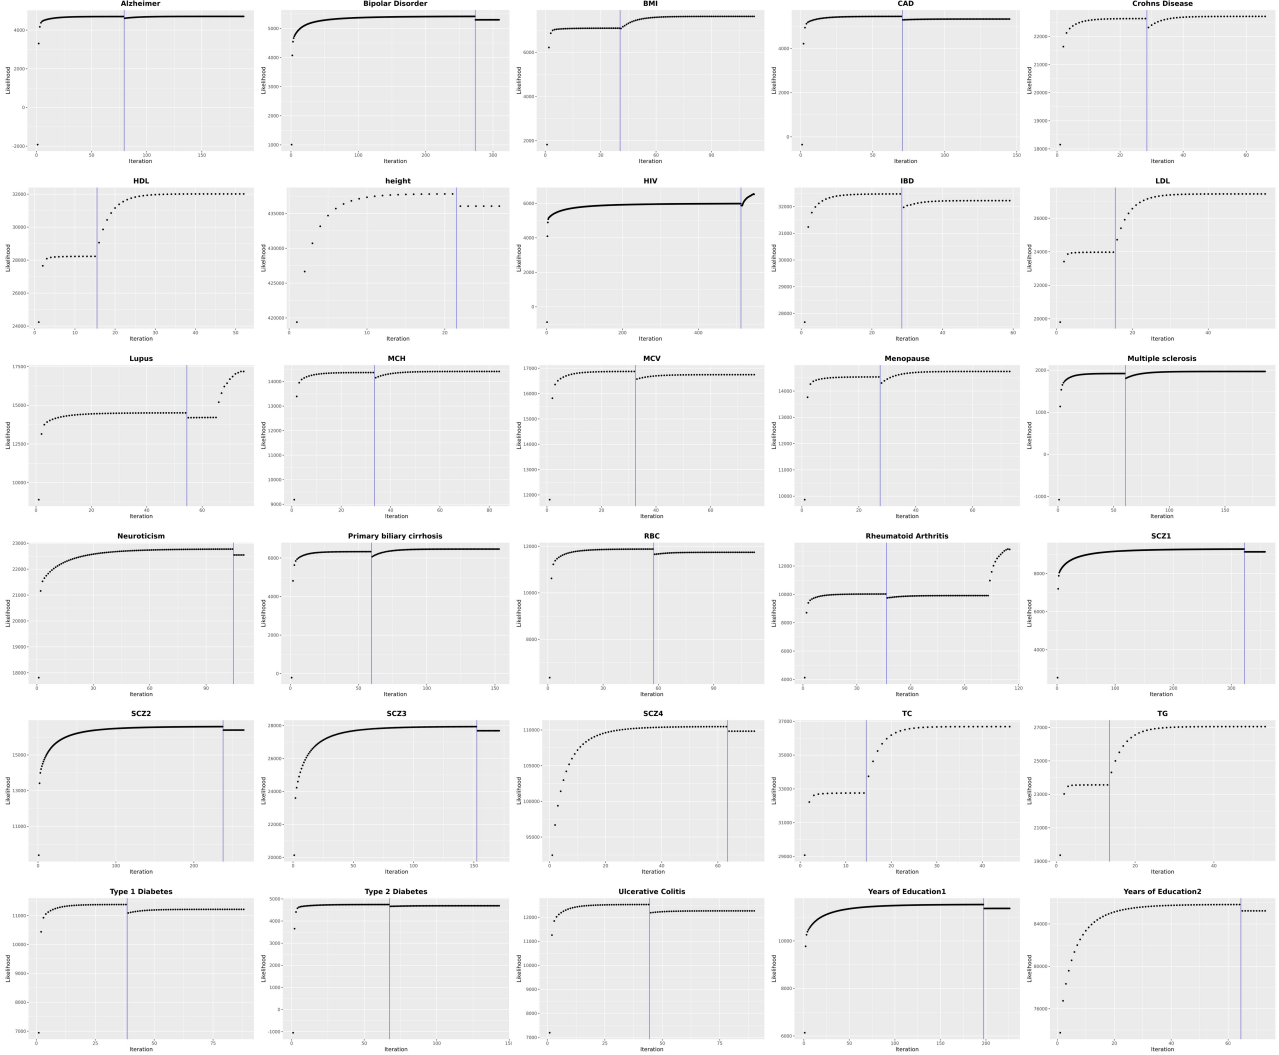

Figure S18: Incomplete log-likelihoods of 30 GWASs by GPA-Tree. Dots on the left and right side of the blue vertical line belongs to the first and second stage of GPA-Tree algorithm, respectively. The complexity parameter  $cp = 0.005$ .

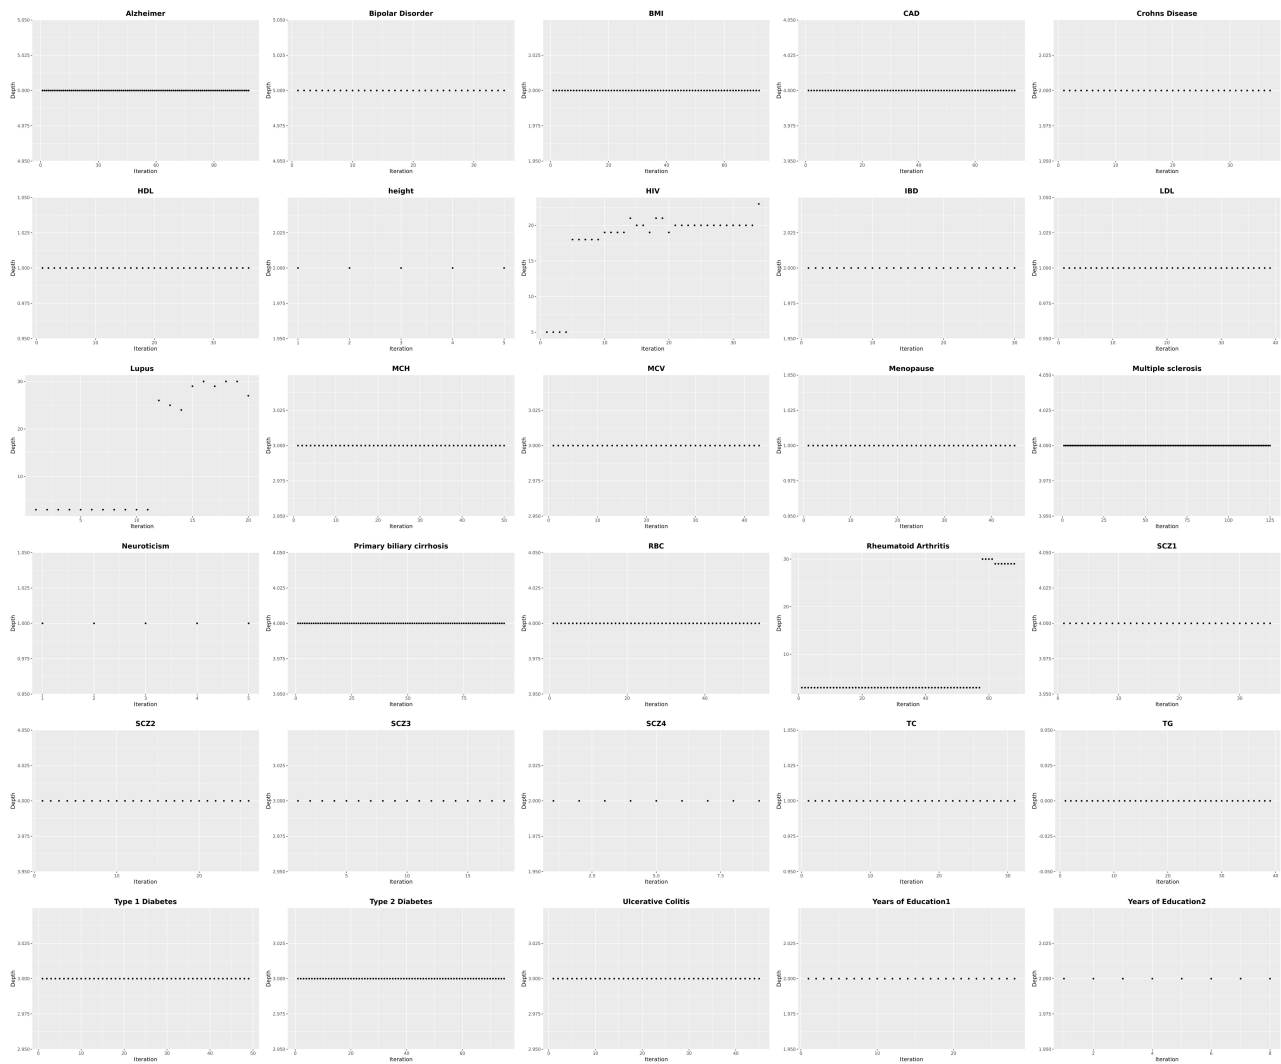

Figure S19: Tree depths of 30 GWASs along the iterations on the second stage of GPA-Tree. The complexity parameter  $cp = 0.005$ .

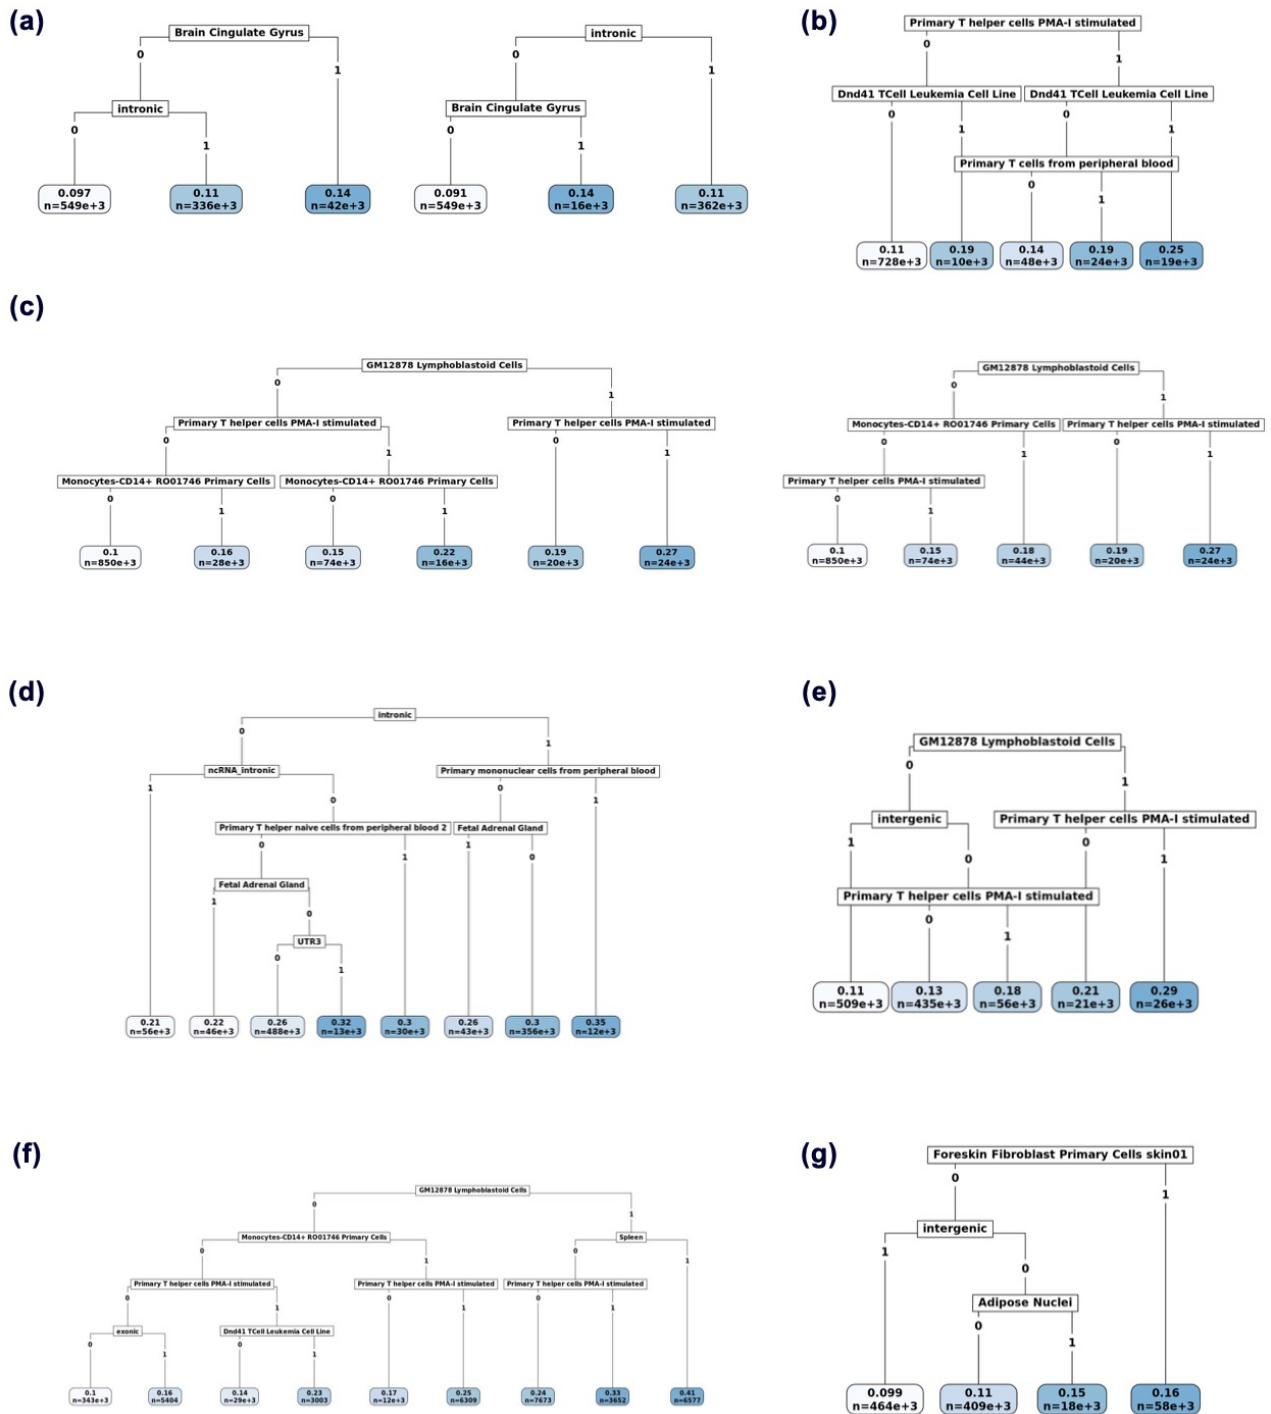

Figure S20: Example fitted trees by GPA-Tree. (a) BMI: tree structure in the 1st and 2nd iterations (left), tree structure in the rest of iterations (right). (b) Type 1 diabetes: pruned tree structure in all iterations. (c) Rheumatoid arthritis: tree structure in the 1st and 2nd iterations (left), tree structure in the 3rd-57th iteration (right). (d) HIV: tree structure in the 1st-4th iterations. (e) Lupus: tree structure in the 11th iteration. Tree structures in the rest iterations of rheumatoid arthritis, HIV and lupus are not shown here due to their large size. (f) Multiple sclerosis: tree structure in all iterations. (g) Type 2 diabetes: tree structure in all iterations.

## 2.2 Performance of PALM with tree depth greater than 2

Continuing the discussion on tree depth in section 1.8, we perform PALM-D3 and PALM-D4 on real data and add the results to Figure 2 as shown in Figure S21. The performance of PALM-D3 and PALM-D4 on real data verify the simulation result in S16: with the increase of tree depth, more SNPs can often be identified but PALM-D3 and PALM-D4 may not provide satisfactory FDR control.

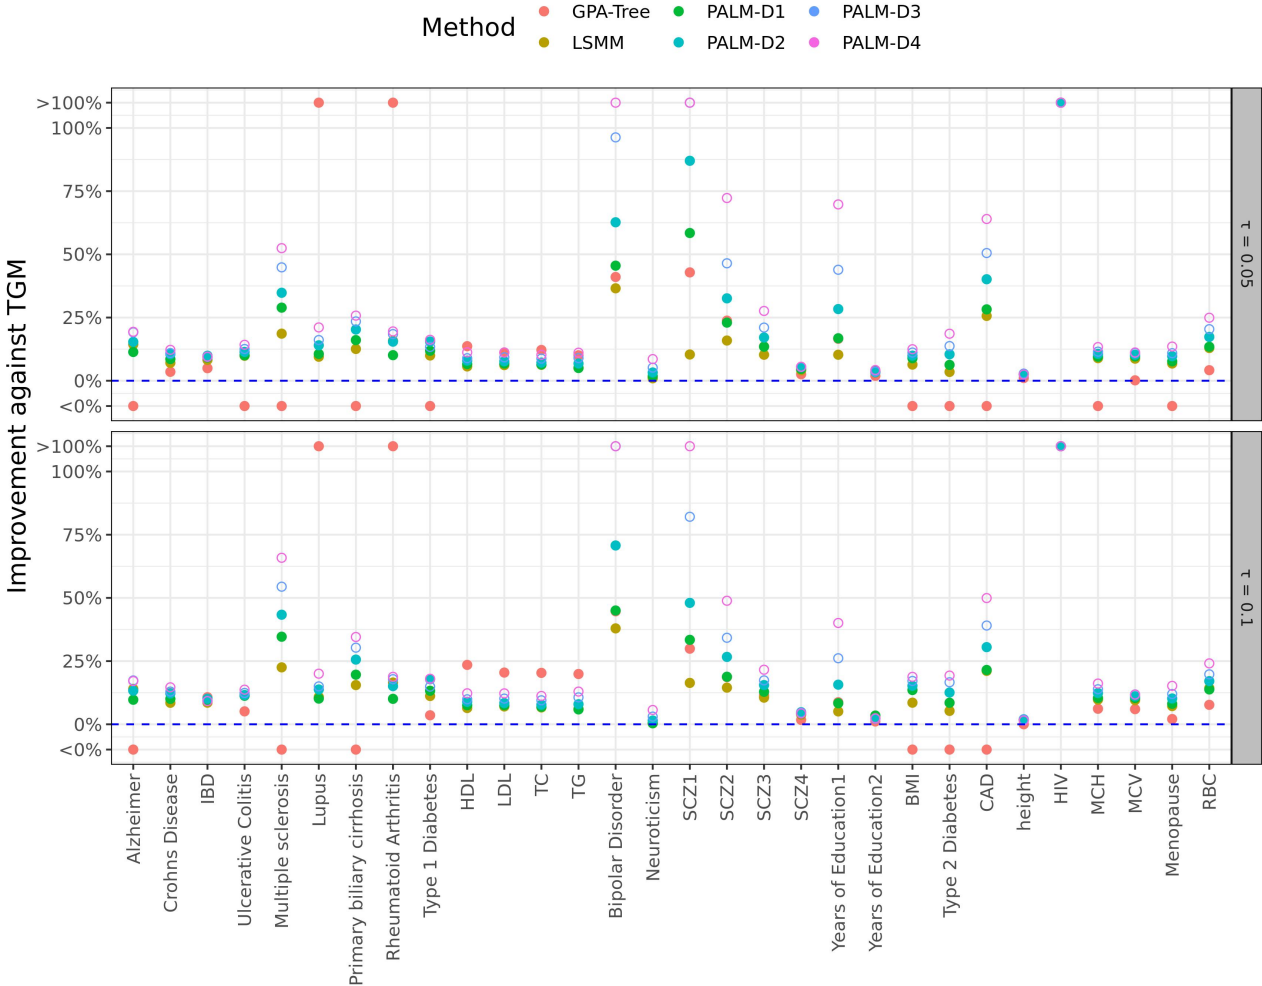

Figure S21: The improvement on the number of prioritized risk SNPs for LSMM, GPA-Tree, PALM-D1, PALM-D2, PALM-D3 and PALM-D4 compared with TGM under the global FDR threshold  $\tau = 0.05$  and  $\tau = 0.1$ .



## 2.3 Numbers of prioritized SNPs in 30 GWASs

| GWAS                      | TGM   | LSMM  | GPA-Tree | PALM-D1 | PALM-D2 |
|---------------------------|-------|-------|----------|---------|---------|
| Alzheimer                 | 501   | 573   | 436      | 558     | 578     |
| Bipolar Disorder          | 134   | 183   | 189      | 195     | 218     |
| BMI                       | 1299  | 1382  | 1024     | 1415    | 1428    |
| CAD                       | 386   | 485   | 379      | 495     | 541     |
| Crohns Disease            | 3568  | 3821  | 3694     | 3874    | 3943    |
| HDL                       | 3108  | 3284  | 3533     | 3313    | 3355    |
| height                    | 78514 | 80628 | 79362    | 80394   | 80650   |
| HIV                       | 2     | 19    | 1173     | 7       | 13      |
| IBD                       | 4928  | 5335  | 5173     | 5382    | 5416    |
| LDL                       | 2860  | 3037  | 3180     | 3055    | 3080    |
| Lupus                     | 1726  | 1890  | 4161     | 1909    | 1968    |
| MCH                       | 2058  | 2242  | 2027     | 2254    | 2277    |
| MCV                       | 2459  | 2674  | 2463     | 2696    | 2712    |
| Menopause                 | 2788  | 2978  | 2654     | 3002    | 3059    |
| Multiple sclerosis        | 408   | 484   | 323      | 526     | 550     |
| Neuroticism               | 3092  | 3122  | 3134     | 3148    | 3193    |
| Primary biliary cirrhosis | 1312  | 1477  | 1033     | 1523    | 1578    |
| RBC                       | 1436  | 1622  | 1496     | 1629    | 1685    |
| Rheumatoid Arthritis      | 1235  | 1430  | 4213     | 1360    | 1426    |
| SCZ1                      | 77    | 85    | 110      | 122     | 144     |
| SCZ2                      | 635   | 736   | 786      | 781     | 842     |
| SCZ3                      | 2800  | 3088  | 3180     | 3177    | 3279    |
| SCZ4                      | 27446 | 28590 | 28151    | 28735   | 28920   |
| TC                        | 3984  | 4235  | 4469     | 4241    | 4270    |
| TG                        | 2423  | 2548  | 2667     | 2545    | 2588    |
| Type 1 Diabetes           | 1482  | 1630  | 1427     | 1658    | 1712    |
| Type 2 Diabetes           | 430   | 445   | 376      | 457     | 475     |
| Ulcerative Colitis        | 1983  | 2179  | 1964     | 2183    | 2209    |
| Years of Education1       | 476   | 525   | 555      | 556     | 611     |
| Years of Education2       | 18678 | 19286 | 19040    | 19389   | 19306   |

Table S2: Numbers of prioritized SNPs of 30 GWASs with different methods under the global FDR threshold  $\tau = 0.05$ .

| <b>GWAS</b>               | <b>TGM</b> | <b>LSMM</b> | <b>GPA-Tree</b> | <b>PALM-D1</b> | <b>PALM-D2</b> |
|---------------------------|------------|-------------|-----------------|----------------|----------------|
| Alzheimer                 | 813        | 927         | 736             | 892            | 921            |
| Bipolar Disorder          | 311        | 429         | 450             | 451            | 531            |
| BMI                       | 1918       | 2082        | 1659            | 2178           | 2210           |
| CAD                       | 819        | 992         | 817             | 995            | 1069           |
| Crohns Disease            | 4760       | 5165        | 5349            | 5239           | 5341           |
| HDL                       | 3638       | 3872        | 4493            | 3913           | 3961           |
| height                    | 107647     | 109652      | 107658          | 109309         | 109791         |
| HIV                       | 43         | 147         | 2193            | 109            | 126            |
| IBD                       | 6905       | 7496        | 7644            | 7549           | 7602           |
| LDL                       | 3343       | 3579        | 4027            | 3596           | 3624           |
| Lupus                     | 2882       | 3194        | 6952            | 3175           | 3279           |
| MCH                       | 2847       | 3125        | 3022            | 3144           | 3199           |
| MCV                       | 3503       | 3838        | 3713            | 3867           | 3892           |
| Menopause                 | 3663       | 3927        | 3739            | 3960           | 4037           |
| Multiple sclerosis        | 586        | 718         | 575             | 789            | 840            |
| Neuroticism               | 5841       | 5864        | 5870            | 5865           | 5929           |
| Primary biliary cirrhosis | 1824       | 2107        | 1687            | 2182           | 2291           |
| RBC                       | 2378       | 2718        | 2561            | 2706           | 2784           |
| Rheumatoid Arthritis      | 2045       | 2383        | 7030            | 2251           | 2354           |
| SCZ1                      | 458        | 533         | 595             | 611            | 678            |
| SCZ2                      | 2089       | 2392        | 2479            | 2482           | 2646           |
| SCZ3                      | 6773       | 7487        | 7554            | 7645           | 7824           |
| SCZ4                      | 48307      | 50158       | 49152           | 50336          | 50624          |
| TC                        | 4675       | 4987        | 5626            | 4999           | 5037           |
| TG                        | 2835       | 3007        | 3399            | 3002           | 3060           |
| Type 1 Diabetes           | 2187       | 2432        | 2265            | 2477           | 2577           |
| Type 2 Diabetes           | 716        | 754         | 645             | 777            | 806            |
| Ulcerative Colitis        | 3030       | 3377        | 3185            | 3372           | 3381           |
| Years of Education1       | 1512       | 1589        | 1644            | 1638           | 1749           |
| Years of Education2       | 33526      | 34490       | 33904           | 34685          | 34306          |

Table S3: Numbers of prioritized SNPs of 30 GWASs with different methods under the global FDR threshold  $\tau = 0.1$ .

## 2.4 Genic category of prioritized SNPs by PALM

We use ANNOVAR [26] to obtain the genic categories of SNPs prioritized by PALM. We found that most prioritized SNPs are indeed in the non-coding regions (Figure S22), consistent with the fact that most GWAS hits are in the non-coding regions.

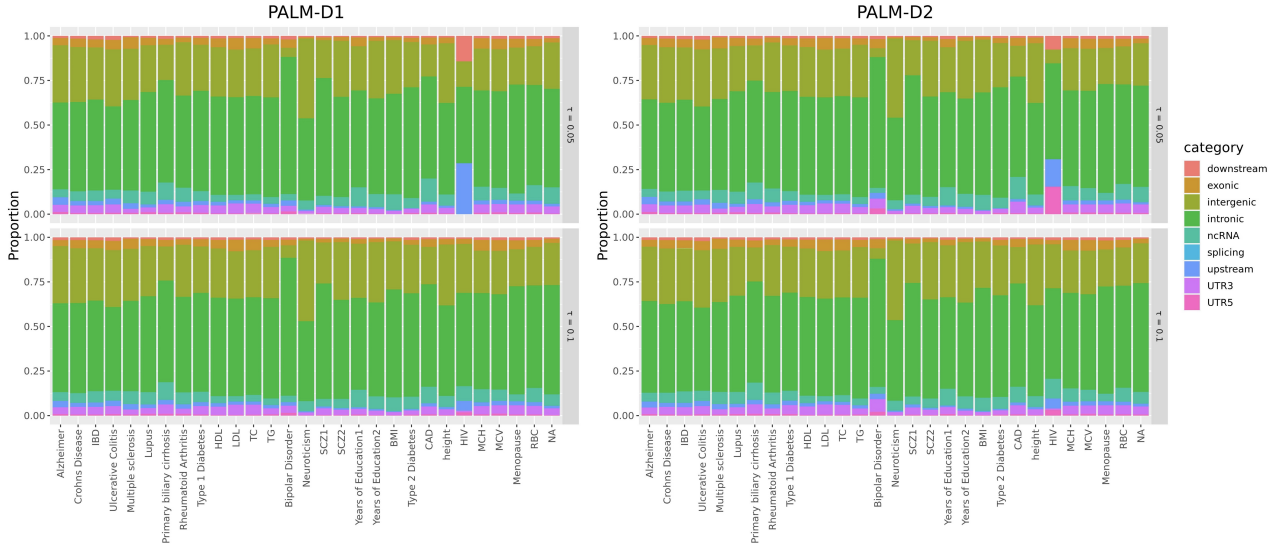

Figure S22: The proportion of 9 genic functional categories of SNPs prioritized by PALM-D1 and PALM-D2 under the FDR threshold  $\tau = 0.05$  and  $\tau = 0.1$ .

## 2.5 Analysis on four Schizophrenia GWASs with different sample sizes

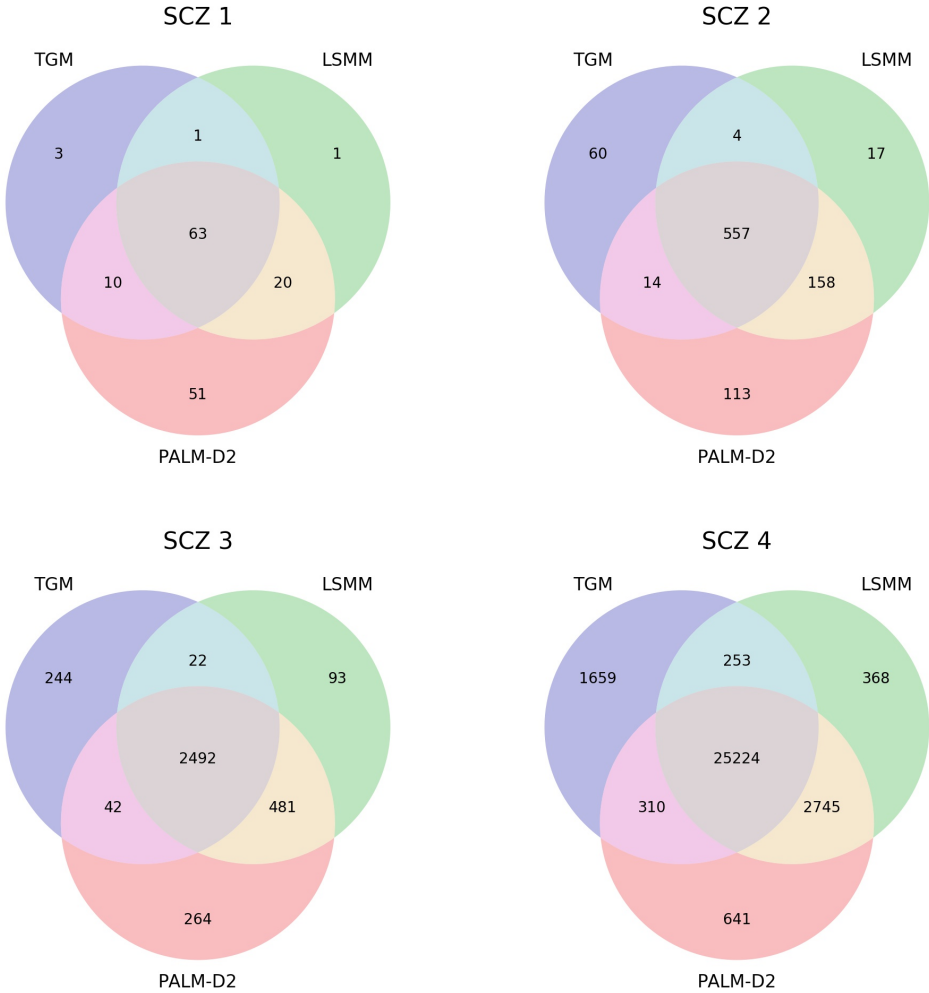

Figure S23: Venn diagrams comparing SNPs prioritized by TGM, LSMM and PALM-D2 of four SCZ GWASs under the FDR control threshold  $\tau = 0.05$ .

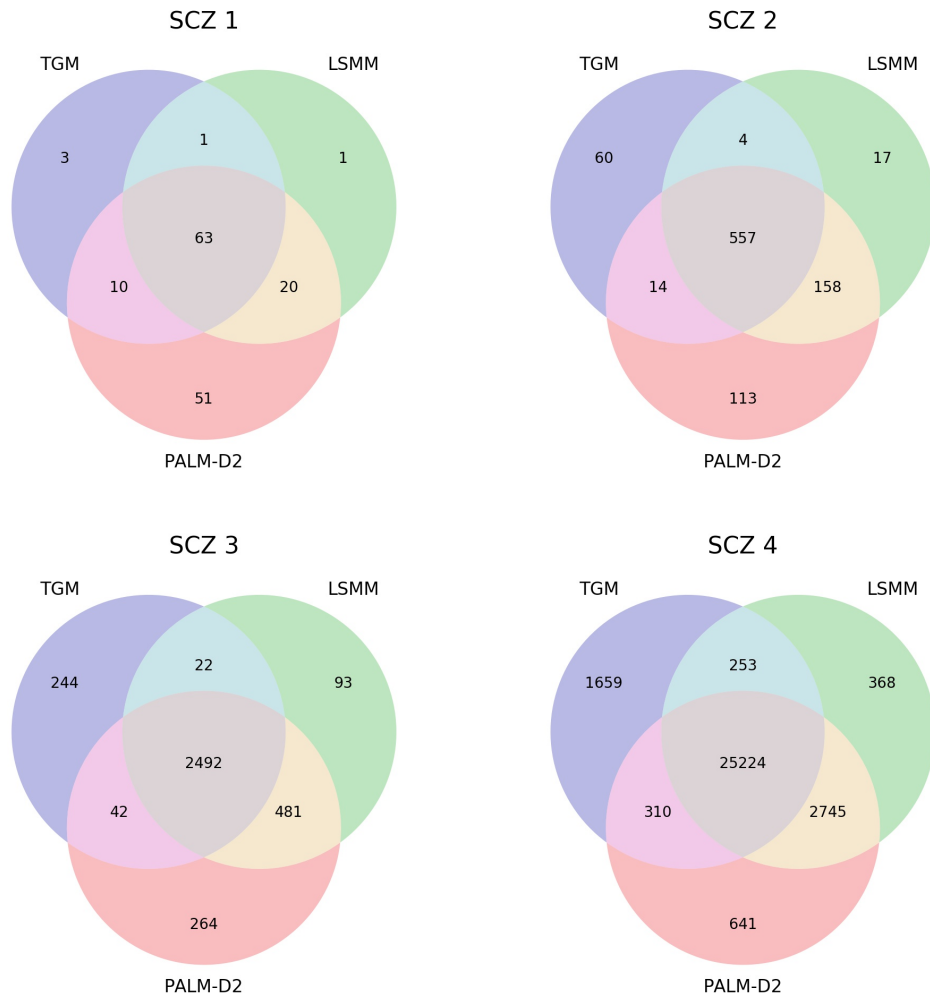

Figure S24: Venn diagrams comparing SNPs prioritized by TGM, LSMM and PALM-D2 of four SCZ GWASs under the FDR control threshold  $\tau = 0.1$ .

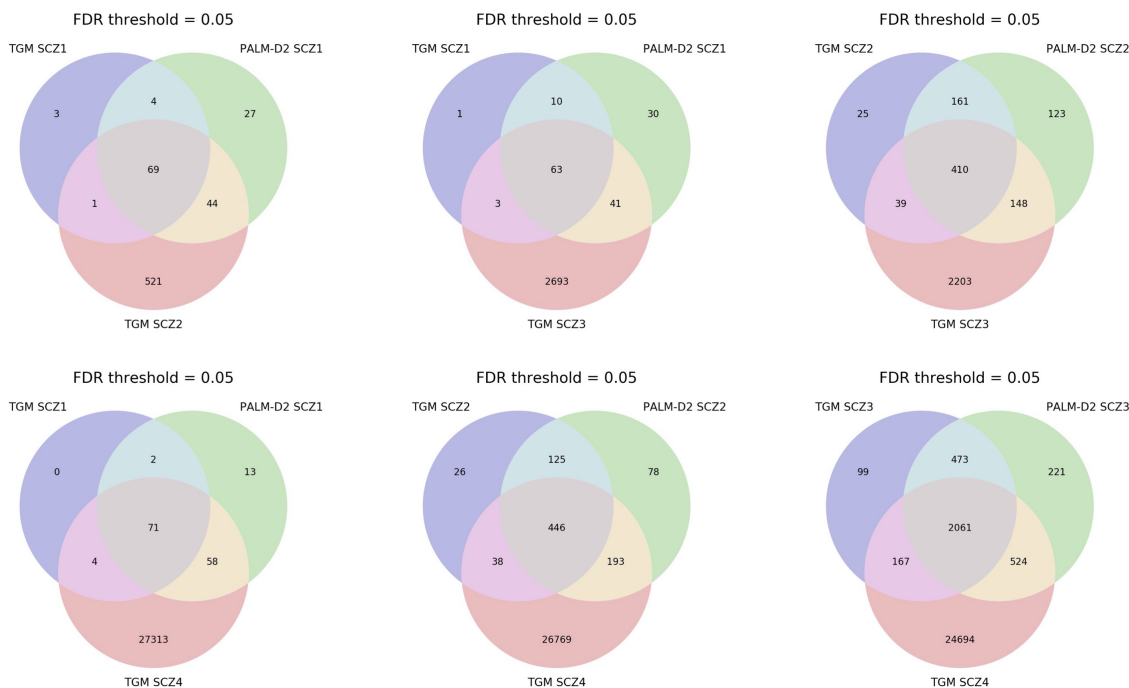

Figure S25: Venn diagrams comparing SNPs prioritized by TGM, PALM-D2 of SCZ GWAS with a smaller sample size and TGM of SCZ GWAS with a larger sample size under the FDR control threshold  $\tau = 0.05$ .

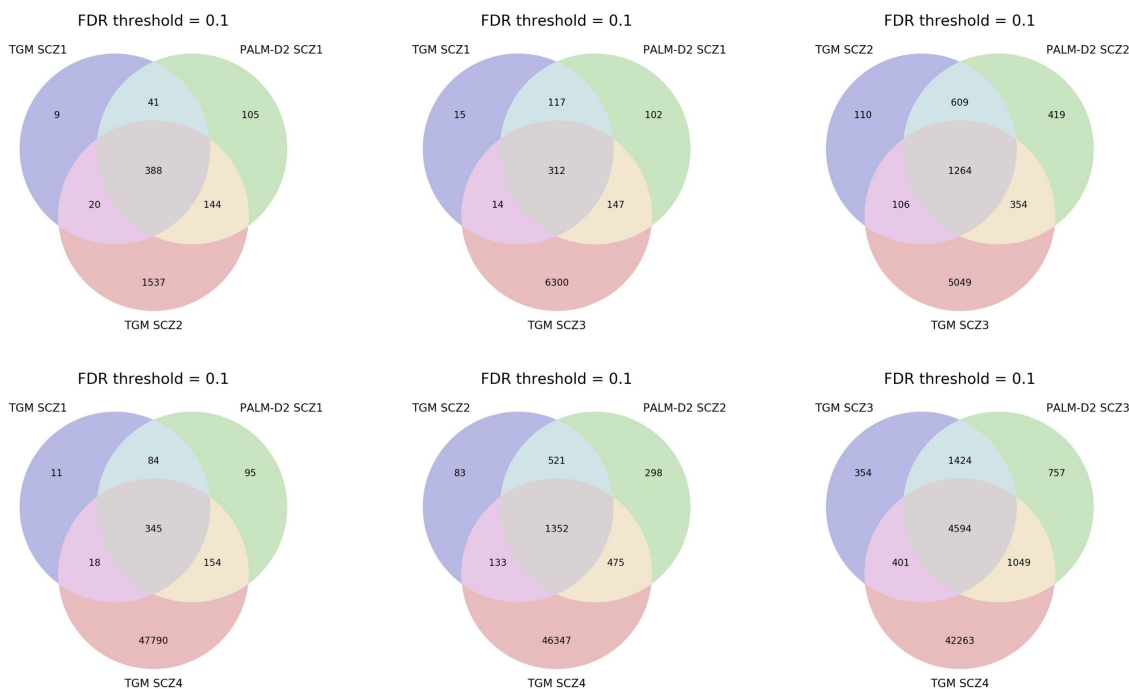

Figure S26: Venn diagrams comparing SNPs prioritized by TGM, PALM-D2 of SCZ GWAS with a smaller sample size and TGM of SCZ GWAS with a larger sample size under the FDR control threshold  $\tau = 0.1$ .

## 2.6 Analysis on two Years of Education GWASs with different sample sizes

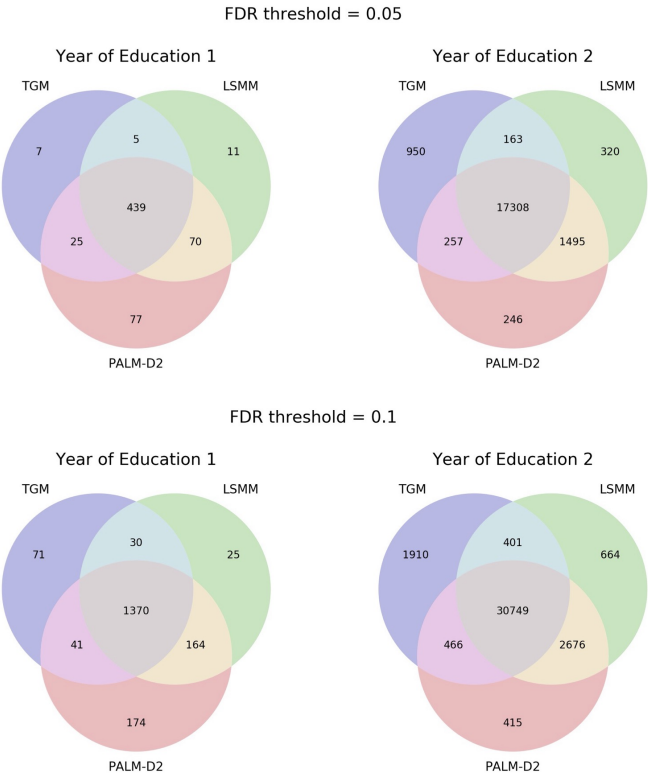

Figure S27: Venn diagrams comparing SNPs prioritized by TGM, LSMM and PALM-D2 of two Years of Education GWASs under the FDR control threshold  $\tau = 0.05$  and  $\tau = 0.1$ .

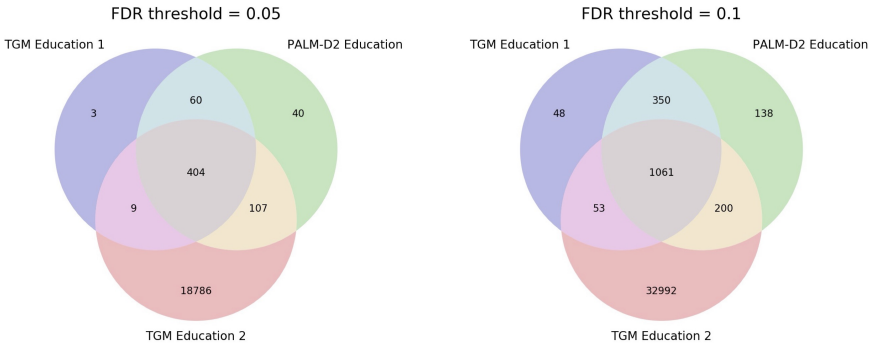

Figure S28: Venn diagrams comparing SNPs prioritized by TGM, PALM-D2 of Years of Education GWAS with a smaller sample size and TGM of Years of Education GWAS with a larger sample size under the FDR control threshold  $\tau = 0.05$  and  $\tau = 0.1$ .

## 2.7 Sources of 30 GWASs

| GWAS/Trait                       | Sample size | Paper/Data link                                                                                                                                                                                                  |
|----------------------------------|-------------|------------------------------------------------------------------------------------------------------------------------------------------------------------------------------------------------------------------|
| Alzheimer                        | 74,046      | [13] ( <a href="https://alkesgroup.broadinstitute.org/sumstats_formatted/">https://alkesgroup.broadinstitute.org/sumstats_formatted/</a> )                                                                       |
| BMI                              | 249,796     | [25] ( <a href="https://alkesgroup.broadinstitute.org/sumstats_formatted/">https://alkesgroup.broadinstitute.org/sumstats_formatted/</a> )                                                                       |
| Bipolar Disorder                 | 16,731      | [2] ( <a href="https://alkesgroup.broadinstitute.org/sumstats_formatted/">https://alkesgroup.broadinstitute.org/sumstats_formatted/</a> )                                                                        |
| CAD (Coronary Artery Disease)    | 86,995      | [24] ( <a href="http://www.cardiogrampluse4d.org/data-downloads/">http://www.cardiogrampluse4d.org/data-downloads/</a> )                                                                                         |
| Crohns Disease                   | 75,000      | [11] ( <a href="https://alkesgroup.broadinstitute.org/sumstats_formatted/">https://alkesgroup.broadinstitute.org/sumstats_formatted/</a> )                                                                       |
| Height                           | 253,288     | [27] ( <a href="https://portals.broadinstitute.org/collaboration/giant/index.php/GIANT_consortium_data_files">https://portals.broadinstitute.org/collaboration/giant/index.php/GIANT_consortium_data_files</a> ) |
| HDL (High-density Lipoprotein)   | 188,577     | [4] ( <a href="http://csg.sph.umich.edu/abecasis/public/lipids2013/">http://csg.sph.umich.edu/abecasis/public/lipids2013/</a> )                                                                                  |
| HIV                              | 13,500      | [14] ( <a href="https://journals.plos.org/plospathogens/article?id=10.1371/journal.ppat.1003515">https://journals.plos.org/plospathogens/article?id=10.1371/journal.ppat.1003515</a> )                           |
| IBD (Inflammatory Bowel Disease) | 75,000      | [11] ( <a href="https://alkesgroup.broadinstitute.org/sumstats_formatted/">https://alkesgroup.broadinstitute.org/sumstats_formatted/</a> )                                                                       |
| LDL (Low-density Lipoprotein)    | 188,577     | [4] ( <a href="http://www.sph.umich.edu/csg/abecasis/public/lipids2013/">http://www.sph.umich.edu/csg/abecasis/public/lipids2013/</a> )                                                                          |
| Lupus                            | 23,210      | [5] ( <a href="https://www.immunobase.org/downloads/protected_data/GWAS_Data/">https://www.immunobase.org/downloads/protected_data/GWAS_Data/</a> )                                                              |
| MCH (Mean Cell Haemoglobin)      | 135,367     | [21] ( <a href="https://ega-archive.org/studies/EGAS00000000132">https://ega-archive.org/studies/EGAS00000000132</a> )                                                                                           |
| MCV (Mean Cell Volume)           | 135,367     | [21] ( <a href="https://ega-archive.org/studies/EGAS00000000132">https://ega-archive.org/studies/EGAS00000000132</a> )                                                                                           |
| Menopause                        | 69,360      | [8] ( <a href="http://www.reprogen.org/data_download.html">http://www.reprogen.org/data_download.html</a> )                                                                                                      |
| Multiple Sclerosis               | 15,474      | [1] ( <a href="https://www.immunobase.org/downloads/protected_data/GWAS_Data/">https://www.immunobase.org/downloads/protected_data/GWAS_Data/</a> )                                                              |
| Neuroticism                      | 170,911     | [18] ( <a href="http://ssgac.org/documents/Neuroticism_Full.txt.gz">http://ssgac.org/documents/Neuroticism_Full.txt.gz</a> )                                                                                     |
| Primary Biliary Cirrhosis        | 13,239      | [7] ( <a href="https://www.immunobase.org/downloads/protected_data/GWAS_Data/">https://www.immunobase.org/downloads/protected_data/GWAS_Data/</a> )                                                              |
| Red Cell Count                   | 135,367     | [21] ( <a href="https://ega-archive.org/studies/EGAS00000000132">https://ega-archive.org/studies/EGAS00000000132</a> )                                                                                           |
| Rheumatoid Arthritis             | 103,638     | [17] ( <a href="https://alkesgroup.broadinstitute.org/sumstats_formatted/">https://alkesgroup.broadinstitute.org/sumstats_formatted/</a> )                                                                       |
| SCZ1 (Schizophrenia)             | 17,115      | [16] ( <a href="https://www.med.unc.edu/pgc/results-and-downloads">https://www.med.unc.edu/pgc/results-and-downloads</a> )                                                                                       |
| SCZ2 (Schizophrenia)             | 21,856      | [3] ( <a href="https://www.med.unc.edu/pgc/results-and-downloads">https://www.med.unc.edu/pgc/results-and-downloads</a> )                                                                                        |
| SCZ3 (Schizophrenia)             | 32,143      | [23] ( <a href="https://www.med.unc.edu/pgc/results-and-downloads">https://www.med.unc.edu/pgc/results-and-downloads</a> )                                                                                       |
| SCZ4 (Schizophrenia)             | 150,064     | [20] ( <a href="https://www.med.unc.edu/pgc/results-and-downloads">https://www.med.unc.edu/pgc/results-and-downloads</a> )                                                                                       |
| TC (Total Cholesterol)           | 188,577     | [4] ( <a href="http://csg.sph.umich.edu/abecasis/public/lipids2013/">http://csg.sph.umich.edu/abecasis/public/lipids2013/</a> )                                                                                  |
| TG (Triglycerides)               | 188,577     | [4] ( <a href="http://csg.sph.umich.edu/abecasis/public/lipids2013/">http://csg.sph.umich.edu/abecasis/public/lipids2013/</a> )                                                                                  |
| Type 1 Diabetes                  | 26,890      | [6] ( <a href="https://www.immunobase.org/downloads/protected_data/GWAS_Data/">https://www.immunobase.org/downloads/protected_data/GWAS_Data/</a> )                                                              |
| Type 2 Diabetes                  | 149,821     | [15] ( <a href="http://diagram-consortium.org/downloads.html">http://diagram-consortium.org/downloads.html</a> )                                                                                                 |
| Ulcerative Colitis               | 75,000      | [11] ( <a href="https://alkesgroup.broadinstitute.org/sumstats_formatted/">https://alkesgroup.broadinstitute.org/sumstats_formatted/</a> )                                                                       |
| Years of Education1              | 126,559     | [22] ( <a href="https://alkesgroup.broadinstitute.org/sumstats_formatted/">https://alkesgroup.broadinstitute.org/sumstats_formatted/</a> )                                                                       |
| Years of Education2              | 293,723     | [19] ( <a href="http://ssgac.org/documents/EduYears_Main.txt.gz">http://ssgac.org/documents/EduYears_Main.txt.gz</a> )                                                                                           |

Table S4: Sources of 30 GWASs in the real data analysis.



## References

- [1] Genetic risk and a primary role for cell-mediated immune mechanisms in multiple sclerosis. *Nature*, 476(7359):214–219, 2011.
- [2] Large-scale genome-wide association analysis of bipolar disorder identifies a new susceptibility locus near ODZ4. *Nature genetics*, 43(10):977–983, 2011.
- [3] Genome-wide association study identifies five new schizophrenia loci. *Nature genetics*, 43(10):969–976, 2011.
- [4] Discovery and refinement of loci associated with lipid levels. *Nature genetics*, 45(11):1274–1283, 2013.
- [5] J. Bentham, D. L. Morris, D. S. Cunninghame Graham, C. L. Pinder, P. Tomblason, T. W. Behrens, J. Martín, B. P. Fairfax, J. C. Knight, L. Chen, et al. Genetic association analyses implicate aberrant regulation of innate and adaptive immunity genes in the pathogenesis of systemic lupus erythematosus. *Nature genetics*, 47(12):1457–1464, 2015.
- [6] J. P. Bradfield, H.-Q. Qu, K. Wang, H. Zhang, P. M. Sleiman, C. E. Kim, F. D. Mentch, H. Qiu, J. T. Glessner, K. A. Thomas, et al. A genome-wide meta-analysis of six type 1 diabetes cohorts identifies multiple associated loci. *PLoS genetics*, 7(9):e1002293, 2011.
- [7] H. J. Cordell, Y. Han, G. F. Mells, Y. Li, G. M. Hirschfield, C. S. Greene, G. Xie, B. D. Juran, D. Zhu, D. C. Qian, et al. International genome-wide meta-analysis identifies new primary biliary cirrhosis risk loci and targetable pathogenic pathways. *Nature communications*, 6(1):1–11, 2015.
- [8] F. R. Day, K. S. Ruth, D. J. Thompson, K. L. Lunetta, N. Pervjakova, D. I. Chasman, L. Stolk, H. K. Finucane, P. Sulem, B. Bulik-Sullivan, et al. Large-scale genomic analyses link reproductive aging to hypothalamic signaling, breast cancer susceptibility and brca1-mediated dna repair. *Nature genetics*, 47(11):1294–1303, 2015.
- [9] J. H. Friedman. Greedy function approximation: a gradient boosting machine. *Annals of statistics*, pages 1189–1232, 2001.
- [10] J. H. Friedman and B. E. Popescu. Predictive learning via rule ensembles. *The annals of applied statistics*, pages 916–954, 2008.
- [11] L. Jostins, S. Ripke, R. K. Weersma, R. H. Duerr, D. P. McGovern, K. Y. Hui, J. C. Lee, L. Philip Schumm, Y. Sharma, C. A. Anderson, et al. Host–microbe interactions have shaped the genetic architecture of inflammatory bowel disease. *Nature*, 491(7422):119–124, 2012.
- [12] A. Khatiwada, B. J. Wolf, A. S. Yilmaz, P. S. Ramos, M. Pietrzak, A. Lawson, K. J. Hunt, H. J. Kim, and D. Chung. GPA-tree: statistical approach for functional-annotation-tree-guided prioritization of GWAS results. *Bioinformatics*, 38(4):1067–1074, 2022.

- [13] J.-C. Lambert, C. A. Ibrahim-Verbaas, D. Harold, A. C. Naj, R. Sims, C. Bellenguez, G. Jun, A. L. DeStefano, J. C. Bis, G. W. Beecham, et al. Meta-analysis of 74,046 individuals identifies 11 new susceptibility loci for alzheimer’s disease. *Nature genetics*, 45(12):1452–1458, 2013.
- [14] P. J. McLaren, C. Coulonges, S. Ripke, L. Van Den Berg, S. Buchbinder, M. Carrington, A. Cossarizza, J. Dalmau, S. G. Deeks, O. Delaneau, et al. Association study of common genetic variants and hiv-1 acquisition in 6,300 infected cases and 7,200 controls. *PLoS pathogens*, 9(7):e1003515, 2013.
- [15] M.-A. of Glucose, I. related traits Consortium (MAGIC) Investigators, G. I. of ANthro-metric Traits (GIANT) Consortium, A. G. E. N.-T. . D. A.-T. Consortium, S. A. T. . D. S. Consortium, A. R. Shuldiner, M. Roden, I. Barroso, T. Wilsgaard, J. Beilby, et al. Large-scale association analysis provides insights into the genetic architecture and pathophysiology of type 2 diabetes. *Nature genetics*, 44(9):981–990, 2012.
- [16] C.-D. G. of the Psychiatric Genomics Consortium et al. Identification of risk loci with shared effects on five major psychiatric disorders: a genome-wide analysis. *The Lancet*, 381(9875):1371–1379, 2013.
- [17] Y. Okada, D. Wu, G. Trynka, T. Raj, C. Terao, K. Ikari, Y. Kochi, K. Ohmura, A. Suzuki, S. Yoshida, et al. Genetics of rheumatoid arthritis contributes to biology and drug discovery. *Nature*, 506(7488):376–381, 2014.
- [18] A. Okbay, B. M. Baselmans, J.-E. De Neve, P. Turley, M. G. Nivard, M. A. Fontana, S. F. W. Meddens, R. K. Linnér, C. A. Rietveld, J. Derringer, et al. Genetic variants associated with subjective well-being, depressive symptoms, and neuroticism identified through genome-wide analyses. *Nature genetics*, 48(6):624–633, 2016a.
- [19] A. Okbay, J. P. Beauchamp, M. A. Fontana, J. J. Lee, T. H. Pers, C. A. Rietveld, P. Turley, G.-B. Chen, V. Emilsson, S. F. W. Meddens, et al. Genome-wide association study identifies 74 loci associated with educational attainment. *Nature*, 533:539–542, 2016b.
- [20] C. Pantelis, G. N. Papadimitriou, S. Papiol, E. Parkhomenko, M. T. Pato, T. Paunio, M. Pejovic-Milovancevic, D. O. Perkins, O. Pietiläinen, et al. Biological insights from 108 schizophrenia-associated genetic loci. *Nature*, 511(7510):421–427, 2014.
- [21] J. K. Pickrell. Joint analysis of functional genomic data and genome-wide association studies of 18 human traits. *The American Journal of Human Genetics*, 94(4):559–573, 2014.
- [22] C. A. Rietveld, S. E. Medland, J. Derringer, J. Yang, T. Esko, N. W. Martin, H.-J. Westra, K. Shakhbazov, A. Abdellaoui, A. Agrawal, et al. Gwas of 126,559 individuals identifies genetic variants associated with educational attainment. *science*, 340(6139):1467–1471, 2013.
- [23] S. Ripke, C. O’dushlaine, K. Chambert, J. L. Moran, A. K. Kähler, S. Akterin, S. E. Bergen, A. L. Collins, J. J. Crowley, M. Fromer, et al. Genome-wide association analysis identifies 13 new risk loci for schizophrenia. *Nature genetics*, 45(10):1150–1159, 2013.

- [24] H. Schunkert, I. R. König, S. Kathiresan, M. P. Reilly, T. L. Assimes, H. Holm, M. Preuss, A. F. Stewart, M. Barbalic, C. Gieger, et al. Large-scale association analysis identifies 13 new susceptibility loci for coronary artery disease. *Nature genetics*, 43(4):333–338, 2011.
- [25] E. K. Speliotes, C. J. Willer, S. I. Berndt, K. L. Monda, G. Thorleifsson, A. U. Jackson, H. L. Allen, C. M. Lindgren, J. Luan, R. Mägi, et al. Association analyses of 249,796 individuals reveal 18 new loci associated with body mass index. *Nature genetics*, 42(11): 937–948, 2010.
- [26] K. Wang, M. Li, and H. Hakonarson. Annovar: functional annotation of genetic variants from high-throughput sequencing data. *Nucleic acids research*, 38(16):e164–e164, 2010.
- [27] A. R. Wood, T. Esko, J. Yang, S. Vedantam, T. H. Pers, S. Gustafsson, A. Y. Chu, K. Estrada, J. Luan, Z. Kutalik, et al. Defining the role of common variation in the genomic and biological architecture of adult human height. *Nature genetics*, 46(11): 1173–1186, 2014.
